# Supplementary material for: Between a rock and a hard place: experimental assessment of recruitment patterns in a bathyal environment of the Low Arctic
Source: PeerJ. 2025 Aug 22;13:e19850. doi: 10.7717/peerj.19850 (PMC12377359; doi:10.7717/peerj.19850)
Supplement: Supplemental Information 2 [file peerj-13-19850-s002.xlsx]

## Sheet: Raw Data
Year	Site	Depth (m)	Altitude (m)	Frame obstructed	Substratum Type	Replicate group	Block	Block face	Block face length (mm)	Block face height (mm)	Phylum	Species	Abundance	Ind length (mm)	Ind width (mm)	Cover % (base)	Cover % (canopy)
2017	Site 1	499	9	Yes	Mesh	Site 1-Mesh	Site 1-M1	1	43.26	55.99	Cnidaria	Campanulariidae msp. 3	1469.42	2.08333	0.36	30	35
2017	Site 1	499	9	Yes	Mesh	Site 1-Mesh	Site 1-M1	1	43.26	55.99	Cnidaria	Eudendrium msp. 1	597.458	5.72	0.623333	10	15
2017	Site 1	499	9	Yes	Mesh	Site 1-Mesh	Site 1-M1	1	43.26	55.99	Arthropoda	Gammaridea msp. 2	1	4.4	0.8	5	0
2017	Site 1	499	9	Yes	Mesh	Site 1-Mesh	Site 1-M1	1	43.26	55.99	Cnidaria	Campanulariidae msp. 2	17		0.813333	5	10
2017	Site 1	499	9	Yes	Mesh	Site 1-Mesh	Site 1-M1	1	43.26	55.99	Foraminifera	Foraminifera msp. 1	58		0.303333	5	1
2017	Site 1	499	9	Yes	Mesh	Site 1-Mesh	Site 1-M1	2	40.25	53.52	Cnidaria	Campanulariidae msp. 2	9	9.16667	0.563333	5	5
2017	Site 1	499	9	Yes	Mesh	Site 1-Mesh	Site 1-M1	2	40.25	53.52	Cnidaria	Campanulariidae msp. 3	229.779	1.55333	0.233333	5	5
2017	Site 1	499	9	Yes	Mesh	Site 1-Mesh	Site 1-M1	2	40.25	53.52	Foraminifera	Foraminifera msp. 1	21			5	0
2017	Site 1	499	9	Yes	Mesh	Site 1-Mesh	Site 1-M1	2	40.25	53.52	Porifera	Porifera msp. 2	1	0.87	0.44	1	0
2017	Site 1	499	9	Yes	Mesh	Site 1-Mesh	Site 1-M1	4	41.43	52.65	Cnidaria	Eudendrium msp. 1	30	3.92	0.46	5	5
2017	Site 1	499	9	Yes	Mesh	Site 1-Mesh	Site 1-M1	4	41.43	52.65	Cnidaria	Campanulariidae msp. 3	46	3.10333	0.373333	5	5
2017	Site 1	499	9	Yes	Mesh	Site 1-Mesh	Site 1-M1	4	41.43	52.65	Foraminifera	Foraminifera msp. 1	11		0.436667	5	0
2017	Site 1	499	9	Yes	Mesh	Site 1-Mesh	Site 1-M1	5	50.91	51.37	Cnidaria	Campanulariidae msp. 3	27	1.78	0.243333	5	5
2017	Site 1	499	9	Yes	Mesh	Site 1-Mesh	Site 1-M1	5	50.91	51.37	Foraminifera	Foraminifera msp. 1	8		0.356667	5	0
2017	Site 1	499	9	Yes	Mesh	Site 1-Mesh	Site 1-M1	5	50.91	51.37	Cnidaria	Eudendrium msp. 1	1	4.93	0.56	1	1
2017	Site 1	499	9	Yes	Mesh	Site 1-Mesh	Site 1-M1	6	50.16	55.64	Cnidaria	Eudendrium msp. 1	35	3.62333	0.646667	5	5
2017	Site 1	499	9	Yes	Mesh	Site 1-Mesh	Site 1-M1	6	50.16	55.64	Cnidaria	Campanulariidae msp. 3	112	2.67	0.33	5	5
2017	Site 1	499	9	Yes	Mesh	Site 1-Mesh	Site 1-M1	6	50.16	55.64	Foraminifera	Foraminifera msp. 1	27		0.533333	5	0
2017	Site 1	499	9	Yes	Mesh	Site 1-Mesh	Site 1-M1	6	50.16	55.64	Arthropoda	Gammaridea msp. 2	2	7.37	1.56	1	0
2017	Site 1	499	9	Yes	Mesh	Site 1-Mesh	Site 1-M1	Internal	50.16	55.64	Porifera	Porifera msp. 3	1	2.44	0.53
2017	Site 1	499	9	Yes	Mesh	Site 1-Mesh	Site 1-M1	Internal	50.16	55.64	Arthropoda	Copepoda msp. 1	4
2017	Site 1	499	9	Yes	Mesh	Site 1-Mesh	Site 1-M1	Internal	50.16	55.64	Foraminifera	Foraminifera msp. 1	8		0.77
2017	Site 1	499	9	Yes	Mesh	Site 1-Mesh	Site 1-M2	1	43.54	50.09	Cnidaria	Campanulariidae msp. 3	3256.84	1.92	0.253333	25	20
2017	Site 1	499	9	Yes	Mesh	Site 1-Mesh	Site 1-M2	1	43.54	50.09	Arthropoda	Gammaridea msp. 2	1	7.84	2.46	5	0
2017	Site 1	499	9	Yes	Mesh	Site 1-Mesh	Site 1-M2	1	43.54	50.09	Cnidaria	Campanulariidae msp. 2	5	19.975	0.79	5	5
2017	Site 1	499	9	Yes	Mesh	Site 1-Mesh	Site 1-M2	1	43.54	50.09	Cnidaria	Eudendrium msp. 1	10	8.98	0.526667	5	5
2017	Site 1	499	9	Yes	Mesh	Site 1-Mesh	Site 1-M2	1	43.54	50.09	Foraminifera	Foraminifera msp. 1	1		0.69	1	0
2017	Site 1	499	9	Yes	Mesh	Site 1-Mesh	Site 1-M2	2	45.12	57.86	Cnidaria	Eudendrium msp. 1	37	9.85333	0.633333	15	20
2017	Site 1	499	9	Yes	Mesh	Site 1-Mesh	Site 1-M2	2	45.12	57.86	Cnidaria	Campanulariidae msp. 3	3463.45	1.59333	0.256667	15	10
2017	Site 1	499	9	Yes	Mesh	Site 1-Mesh	Site 1-M2	2	45.12	57.86	Arthropoda	Halacaridae msp. 1	1	0.74	0.37	1	0
2017	Site 1	499	9	Yes	Mesh	Site 1-Mesh	Site 1-M2	2	45.12	57.86	Arthropoda	Caprellidae msp. 1	1	4.18667	0.57	0	5
2017	Site 1	499	9	Yes	Mesh	Site 1-Mesh	Site 1-M2	3	47.48	48.45	Cnidaria	Campanulariidae msp. 3	2193.05	4.80667	0.703333	15	10
2017	Site 1	499	9	Yes	Mesh	Site 1-Mesh	Site 1-M2	3	47.48	48.45	Cnidaria	Campanulariidae msp. 2	9	8.59667	0.496667	5	5
2017	Site 1	499	9	Yes	Mesh	Site 1-Mesh	Site 1-M2	3	47.48	48.45	Cnidaria	Eudendrium msp. 1	11	6.62667	0.5	5	5
2017	Site 1	499	9	Yes	Mesh	Site 1-Mesh	Site 1-M2	5	54.84	48.58	Cnidaria	Campanulariidae msp. 3	1039.01	4.13333	0.506667	10	5
2017	Site 1	499	9	Yes	Mesh	Site 1-Mesh	Site 1-M2	5	54.84	48.58	Cnidaria	Campanulariidae msp. 2	1		0.82	1	1
2017	Site 1	499	9	Yes	Mesh	Site 1-Mesh	Site 1-M2	6	59.35	48.71	Cnidaria	Eudendrium msp. 1	10	7.79333	0.486667	5	5
2017	Site 1	499	9	Yes	Mesh	Site 1-Mesh	Site 1-M2	6	59.35	48.71	Cnidaria	Campanulariidae msp. 3	1917.66	2.02667	0.31	5	5
2017	Site 1	499	9	Yes	Mesh	Site 1-Mesh	Site 1-M2	6	59.35	48.71	Cnidaria	Campanulariidae msp. 2	1	20.08	0.78	1	5
2017	Site 1	499	9	Yes	Mesh	Site 1-Mesh	Site 1-M2	Internal	59.35	48.71	Arthropoda	Copepoda msp. 1	2	3.65	1.29
2017	Site 1	499	9	Yes	Mesh	Site 1-Mesh	Site 1-M2	Internal	59.35	48.71	Cnidaria	Actinaria msp. 1	1		0.51
2017	Site 1	499	9	Yes	Mesh	Site 1-Mesh	Site 1-M2	Internal	59.35	48.71	Cnidaria	Campanulariidae msp. 3
2017	Site 1	499	9	Yes	Mesh	Site 1-Mesh	Site 1-M2	Internal	59.35	48.71	Cnidaria	Eudendrium msp. 1
2017	Site 1	499	9	Yes	Mesh	Site 1-Mesh	Site 1-M3	1	47.57	58.12	Cnidaria	Campanulariidae msp. 3	3502.04	2.07333	0.28	20	15
2017	Site 1	499	9	Yes	Mesh	Site 1-Mesh	Site 1-M3	1	47.57	58.12	Cnidaria	Campanulariidae msp. 2	10	19.1433	0.88	5	20
2017	Site 1	499	9	Yes	Mesh	Site 1-Mesh	Site 1-M3	1	47.57	58.12	Cnidaria	Campanulariidae msp. 4	1	8.13	0.153333	1	1
2017	Site 1	499	9	Yes	Mesh	Site 1-Mesh	Site 1-M3	1	47.57	58.12	Cnidaria	Octocorallia msp. 1	1		1.28	1	0
2017	Site 1	499	9	Yes	Mesh	Site 1-Mesh	Site 1-M3	2	47.23	57.36	Cnidaria	Campanulariidae msp. 3	614.066	1.16333	0.253333	10	5
2017	Site 1	499	9	Yes	Mesh	Site 1-Mesh	Site 1-M3	2	47.23	57.36	Arthropoda	Copepoda msp. 1	1	1.09	0.67	1	0
2017	Site 1	499	9	Yes	Mesh	Site 1-Mesh	Site 1-M3	2	47.23	57.36	Arthropoda	Copepoda msp. 1	1	3.29	0.96	1	0
2017	Site 1	499	9	Yes	Mesh	Site 1-Mesh	Site 1-M3	2	47.23	57.36	Cnidaria	Campanulariidae msp. 2	1	16.25	0.86	1	5
2017	Site 1	499	9	Yes	Mesh	Site 1-Mesh	Site 1-M3	3	41.63	57.38	Cnidaria	Campanulariidae msp. 3	1345.65	1.4	0.3	5	5
2017	Site 1	499	9	Yes	Mesh	Site 1-Mesh	Site 1-M3	3	41.63	57.38	Arthropoda	Copepoda msp. 1	2	3.51	0.82	1	0
2017	Site 1	499	9	Yes	Mesh	Site 1-Mesh	Site 1-M3	3	41.63	57.38	Cnidaria	Eudendrium msp. 1	3		0.666667	1	1
2017	Site 1	499	9	Yes	Mesh	Site 1-Mesh	Site 1-M3	5	52.06	56.56	Cnidaria	Campanulariidae msp. 2	5	21.725	0.683333	5	5
2017	Site 1	499	9	Yes	Mesh	Site 1-Mesh	Site 1-M3	5	52.06	56.56	Cnidaria	Campanulariidae msp. 3	932.429	2.19	0.356667	5	5
2017	Site 1	499	9	Yes	Mesh	Site 1-Mesh	Site 1-M3	6	55.38	56.52	Cnidaria	Campanulariidae msp. 3	3547.42	1.23	0.27	10	5
2017	Site 1	499	9	Yes	Mesh	Site 1-Mesh	Site 1-M3	6	55.38	56.52	Cnidaria	Campanulariidae msp. 2	6	16.2133	0.766667	5	10
2017	Site 1	499	9	Yes	Mesh	Site 1-Mesh	Site 1-M3	Internal	55.38	56.52	Arthropoda	Copepoda msp. 1	1	1.37	0.34
2017	Site 1	499	9	Yes	Mesh	Site 1-Mesh	Site 1-M3	Internal	55.38	56.52	Arthropoda	Copepoda msp. 1	5	2.21667	0.863333
2017	Site 1	499	9	Yes	Plastic	Site 1-Plastic	Site 1-P1	1	33.14	34.23	Cnidaria	Campanulariidae msp. 3	949.1	2.45	0.41	60	40
2017	Site 1	499	9	Yes	Plastic	Site 1-Plastic	Site 1-P1	1	33.14	34.23	Cnidaria	Campanulariidae msp. 2	3	7.9	0.472	5	10
2017	Site 1	499	9	Yes	Plastic	Site 1-Plastic	Site 1-P1	3	32.62	33.14	Cnidaria	Campanulariidae msp. 3	108.103	0.7	0.26	5	1
2017	Site 1	499	9	Yes	Plastic	Site 1-Plastic	Site 1-P1	4	32.88	33.67	Cnidaria	Campanulariidae msp. 3	1121.83	1.38333	0.3	60	20
2017	Site 1	499	9	Yes	Plastic	Site 1-Plastic	Site 1-P1	5	32.88	33.28	Cnidaria	Campanulariidae msp. 3	153.194	0.956667	0.27	20	5
2017	Site 1	499	9	Yes	Plastic	Site 1-Plastic	Site 1-P1	5	32.88	33.28	Cnidaria	Campanulariidae msp. 2 low	521.591	1.34333	0.283333	5	5
2017	Site 1	499	9	Yes	Plastic	Site 1-Plastic	Site 1-P1	6	33.25	33.34	Cnidaria	Campanulariidae msp. 3	827.721	2.26667	0.336667	50	20
2017	Site 1	499	9	Yes	Plastic	Site 1-Plastic	Site 1-P2	1	32.84	34.14	Cnidaria	Campanulariidae msp. 3	919.349	1.55333	0.273333	30	10
2017	Site 1	499	9	Yes	Plastic	Site 1-Plastic	Site 1-P2	3	33.38	34.12	Cnidaria	Campanulariidae msp. 3	865.583	1.67	0.306667	20	20
2017	Site 1	499	9	Yes	Plastic	Site 1-Plastic	Site 1-P2	3	33.38	34.12	Cnidaria	Eudendrium msp. 1	91.114		0.743333	5	30
2017	Site 1	499	9	Yes	Plastic	Site 1-Plastic	Site 1-P2	4	33.03	33.89	Cnidaria	Campanulariidae msp. 3	1373.11	1.58333	0.283333	30	20
2017	Site 1	499	9	Yes	Plastic	Site 1-Plastic	Site 1-P2	4	33.03	33.89	Cnidaria	Campanulariidae msp. 2	11		0.683333	10	30
2017	Site 1	499	9	Yes	Plastic	Site 1-Plastic	Site 1-P2	5	33.6	33.37	Cnidaria	Campanulariidae msp. 3	1110.02	1.92333	0.313333	40	20
2017	Site 1	499	9	Yes	Plastic	Site 1-Plastic	Site 1-P2	5	33.6	33.37	Cnidaria	Eudendrium msp. 1	22.4246		0.603333	1	5
2017	Site 1	499	9	Yes	Plastic	Site 1-Plastic	Site 1-P2	6	32.64	32.97	Cnidaria	Campanulariidae msp. 3	484.263	2.59333	0.396667	10	5
2017	Site 1	499	9	Yes	Plastic	Site 1-Plastic	Site 1-P2	6	32.64	32.97	Cnidaria	Octocorallia msp. 1	1	1.34	0.82	1	0
2017	Site 1	499	9	Yes	Plastic	Site 1-Plastic	Site 1-P3	1	32.47	32.86	Cnidaria	Campanulariidae msp. 3	1002.95	3.19667	0.383333	40	20
2017	Site 1	499	9	Yes	Plastic	Site 1-Plastic	Site 1-P3	1	32.47	32.86	Cnidaria	Campanulariidae msp. 2	8		1.01667	20	50
2017	Site 1	499	9	Yes	Plastic	Site 1-Plastic	Site 1-P3	3	32.27	33.02	Cnidaria	Campanulariidae msp. 3	483.052	1.45	0.303333	15	5
2017	Site 1	499	9	Yes	Plastic	Site 1-Plastic	Site 1-P3	3	32.27	33.02	Cnidaria	Campanulariidae msp. 2	26	1.25	0.453333	10	20
2017	Site 1	499	9	Yes	Plastic	Site 1-Plastic	Site 1-P3	3	32.27	33.02	Cnidaria	Campanulariidae msp. 2 low	103.004	1.25	0.453333	10	20
2017	Site 1	499	9	Yes	Plastic	Site 1-Plastic	Site 1-P3	3	32.27	33.02	Cnidaria	Octocorallia msp. 1	1		0.96	1	0
2017	Site 1	499	9	Yes	Plastic	Site 1-Plastic	Site 1-P3	4	31.58	32.65	Cnidaria	Campanulariidae msp. 3	326.511	1.08667	0.246667	10	1
2017	Site 1	499	9	Yes	Plastic	Site 1-Plastic	Site 1-P3	4	31.58	32.65	Cnidaria	Campanulariidae msp. 2	2			1	5
2017	Site 1	499	9	Yes	Plastic	Site 1-Plastic	Site 1-P3	5	32.17	32.8	Cnidaria	Campanulariidae msp. 3	432.622	1.88333	0.263333	20	5
2017	Site 1	499	9	Yes	Plastic	Site 1-Plastic	Site 1-P3	5	32.17	32.8	Cnidaria	Campanulariidae msp. 2	14			5	10
2017	Site 1	499	9	Yes	Plastic	Site 1-Plastic	Site 1-P3	6	32.81	32.98	Cnidaria	Campanulariidae msp. 3	331.836	1.66	0.336667	15	5
2017	Site 1	499	9	Yes	Plastic	Site 1-Plastic	Site 1-P3	6	32.81	32.98	Cnidaria	Campanulariidae msp. 2	3			5	5
2017	Site 1	499	9	Yes	Stone	Site 1-Stone	Site 1-S1	1	53.11	53.95	Cnidaria	Campanulariidae msp. 3	1805.13	1.53667	0.3	50	30
2017	Site 1	499	9	Yes	Stone	Site 1-Stone	Site 1-S1	1	53.11	53.95	Cnidaria	Campanulariidae msp. 2	3	7.8	0.566667	1	1
2017	Site 1	499	9	Yes	Stone	Site 1-Stone	Site 1-S1	2	52.72	53.47	Cnidaria	Campanulariidae msp. 3	1146.37	2.45	0.4	15	5
2017	Site 1	499	9	Yes	Stone	Site 1-Stone	Site 1-S1	2	52.72	53.47	Cnidaria	Campanulariidae msp. 2	1	6.5	0.6	1	1
2017	Site 1	499	9	Yes	Stone	Site 1-Stone	Site 1-S1	4	53.16	53.87	Cnidaria	Campanulariidae msp. 3	248.19	0.4	0.3	5
2017	Site 1	499	9	Yes	Stone	Site 1-Stone	Site 1-S1	5	53.1	52.53	Cnidaria	Campanulariidae msp. 3	9	0.6	0.166667	1
2017	Site 1	499	9	Yes	Stone	Site 1-Stone	Site 1-S1	6	53.02	52.84	Cnidaria	Campanulariidae msp. 3	1466.16	1.23333	0.25	40	20
2017	Site 1	499	9	Yes	Stone	Site 1-Stone	Site 1-S1	6	53.02	52.84	Cnidaria	Campanulariidae msp. 2	8	9.43333	0.833333	5	5
2017	Site 1	499	9	Yes	Stone	Site 1-Stone	Site 1-S2	1	52.56	54.51	Cnidaria	Campanulariidae msp. 3	3533.56	6.12667	0.853333	60	70
2017	Site 1	499	9	Yes	Stone	Site 1-Stone	Site 1-S2	1	52.56	54.51	Cnidaria	Eudendrium msp. 1	248.304		1.00333	25	10
2017	Site 1	499	9	Yes	Stone	Site 1-Stone	Site 1-S2	1	52.56	54.51	Cnidaria	Campanulariidae msp. 2	1	13.3	0.63	1	1
2017	Site 1	499	9	Yes	Stone	Site 1-Stone	Site 1-S2	3	52.27	53.47	Cnidaria	Campanulariidae msp. 3	1248.38	4.44	0.993333	10	5
2017	Site 1	499	9	Yes	Stone	Site 1-Stone	Site 1-S2	3	52.27	53.47	Unknown	Unknown msp. 1	2		0.65	1	0
2017	Site 1	499	9	Yes	Stone	Site 1-Stone	Site 1-S2	4	53.09	54	Cnidaria	Campanulariidae msp. 3	2675.74	2.68667	0.613333	10	5
2017	Site 1	499	9	Yes	Stone	Site 1-Stone	Site 1-S2	4	53.09	54	Cnidaria	Campanulariidae msp. 2	8		1.11333	5	5
2017	Site 1	499	9	Yes	Stone	Site 1-Stone	Site 1-S2	4	53.09	54	Cnidaria	Eudendrium msp. 1	8		0.47	5	5
2017	Site 1	499	9	Yes	Stone	Site 1-Stone	Site 1-S2	5	54.27	53.65	Cnidaria	Eudendrium msp. 1	21		0.596667	5	5
2017	Site 1	499	9	Yes	Stone	Site 1-Stone	Site 1-S2	5	54.27	53.65	Cnidaria	Campanulariidae msp. 3	922.002	1.14667	0.363333	5	5
2017	Site 1	499	9	Yes	Stone	Site 1-Stone	Site 1-S2	5	54.27	53.65	Cnidaria	Octocorallia msp. 1	1			1	0
2017	Site 1	499	9	Yes	Stone	Site 1-Stone	Site 1-S2	6	53.57	53.83	Cnidaria	Campanulariidae msp. 3	663.245	3.09333	0.54	10	5
2017	Site 1	499	9	Yes	Stone	Site 1-Stone	Site 1-S2	6	53.57	53.83	Cnidaria	Campanulariidae msp. 2	8	7.31667	0.613333	5	5
2017	Site 1	499	9	Yes	Stone	Site 1-Stone	Site 1-S2	6	53.57	53.83	Cnidaria	Campanulariidae msp. 2 low	326.816	1.02333	0.416667	5	5
2017	Site 1	499	9	Yes	Stone	Site 1-Stone	Site 1-S3	2	54.19	54.28	Cnidaria	Campanulariidae msp. 3	1745.25	0.816667	0.393333	10	15
2017	Site 1	499	9	Yes	Stone	Site 1-Stone	Site 1-S3	2	54.19	54.28	Cnidaria	Eudendrium msp. 1	8		0.476667	5	5
2017	Site 1	499	9	Yes	Stone	Site 1-Stone	Site 1-S3	2	54.19	54.28	Foraminifera	Foraminifera msp. 1	2		0.43	1	0
2017	Site 1	499	9	Yes	Stone	Site 1-Stone	Site 1-S3	3	53.58	53.4	Cnidaria	Campanulariidae msp. 3	1049.1	0.546667	0.223333	15	10
2017	Site 1	499	9	Yes	Stone	Site 1-Stone	Site 1-S3	3	53.58	53.4	Unknown	Unknown msp. 1	70		0.156667	5	0
2017	Site 1	499	9	Yes	Stone	Site 1-Stone	Site 1-S3	4	53.56	53.1	Cnidaria	Campanulariidae msp. 3	1232.42	1.26667	0.24	10	5
2017	Site 1	499	9	Yes	Stone	Site 1-Stone	Site 1-S3	4	53.56	53.1	Cnidaria	Eudendrium msp. 1	2		0.32	5	1
2017	Site 1	499	9	Yes	Stone	Site 1-Stone	Site 1-S3	4	53.56	53.1	Unknown	Unknown msp. 1	27		0.206667	5	0
2017	Site 1	499	9	Yes	Stone	Site 1-Stone	Site 1-S3	5	54.06	53.12	Cnidaria	Campanulariidae msp. 3	2048.46	1.80667	0.313333	15	10
2017	Site 1	499	9	Yes	Stone	Site 1-Stone	Site 1-S3	5	54.06	53.12	Cnidaria	Eudendrium msp. 1	25		0.413333	5	5
2017	Site 1	499	9	Yes	Wood	Site 1-Wood	Site 1-W	1	180	50	Cnidaria	Campanulariidae msp. 3	200			75	70
2017	Site 1	499	9	Yes	Wood	Site 1-Wood	Site 1-W	2	180	30	Cnidaria	Campanulariidae msp. 3	90			65	55
2017	Site 1	499	9	Yes	Wood	Site 1-Wood	Site 1-W	2	180	30	Foraminifera	Foraminifera msp. 1	1		0.48	1	0
2017	Site 1	499	9	Yes	Wood	Site 1-Wood	Site 1-W	4	179	28	Cnidaria	Campanulariidae msp. 3	240			80	75
2017	Site 1	499	9	Yes	Wood	Site 1-Wood	Site 1-W	5	51	30	Cnidaria	Campanulariidae msp. 3	25			40	30
2017	Site 1	499	9	Yes	Wood	Site 1-Wood	Site 1-W	6	52	28	Cnidaria	Campanulariidae msp. 3	30			50	35
2019	Site 4	505	11	No	Mesh	Site 4-Mesh	Site 4-M1	1	65.74	51.8	Cnidaria	Campanulariidae msp. 3	1078.36	1.20333	0.263333	15	10
2019	Site 4	505	11	No	Mesh	Site 4-Mesh	Site 4-M1	1	65.74	51.8	Cnidaria	Campanulariidae msp. 2	35		1.49667	10	60
2019	Site 4	505	11	No	Mesh	Site 4-Mesh	Site 4-M1	1	65.74	51.8	Cnidaria	Eudendrium msp. 1	4	9.04667	0.56	1	5
2019	Site 4	505	11	No	Mesh	Site 4-Mesh	Site 4-M1	1	65.74	51.8	Cnidaria	Campanulariidae msp. 4	3	11.9	0.216667	1	5
2019	Site 4	505	11	No	Mesh	Site 4-Mesh	Site 4-M1	2	59.89	49.98	Arthropoda	Copepoda msp. 1	2	3.245	0.86	5	0
2019	Site 4	505	11	No	Mesh	Site 4-Mesh	Site 4-M1	2	59.89	49.98	Cnidaria	Campanulariidae msp. 3	229.487	3.22333	0.386667	5	5
2019	Site 4	505	11	No	Mesh	Site 4-Mesh	Site 4-M1	2	59.89	49.98	Cnidaria	Actinaria msp. 1	2	0.46	0.29	1	1
2019	Site 4	505	11	No	Mesh	Site 4-Mesh	Site 4-M1	2	59.89	49.98	Cnidaria	Eudendrium msp. 1	2	7.77	0.436667	1	5
2019	Site 4	505	11	No	Mesh	Site 4-Mesh	Site 4-M1	2	59.89	49.98	Cnidaria	Campanulariidae msp. 4	7	8.71333	0.27	1	5
2019	Site 4	505	11	No	Mesh	Site 4-Mesh	Site 4-M1	3	62.53	51.55	Cnidaria	Campanulariidae msp. 2	5		1.215	5	5
2019	Site 4	505	11	No	Mesh	Site 4-Mesh	Site 4-M1	3	62.53	51.55	Cnidaria	Campanulariidae msp. 3	1515.01	3.43	0.373333	5	5
2019	Site 4	505	11	No	Mesh	Site 4-Mesh	Site 4-M1	3	62.53	51.55	Foraminifera	Foraminifera msp. 2	1		0.42	1	0
2019	Site 4	505	11	No	Mesh	Site 4-Mesh	Site 4-M1	3	62.53	51.55	Foraminifera	Foraminifera msp. 3	1		0.27	1	0
2019	Site 4	505	11	No	Mesh	Site 4-Mesh	Site 4-M1	3	62.53	51.55	Mollusca	Gastropoda msp. 1	1		0.48	1	0
2019	Site 4	505	11	No	Mesh	Site 4-Mesh	Site 4-M1	4	59.63	48.93	Cnidaria	Campanulariidae msp. 3	1128.18	3.55333	0.376667	10	5
2019	Site 4	505	11	No	Mesh	Site 4-Mesh	Site 4-M1	4	59.63	48.93	Cnidaria	Campanulariidae msp. 2	16	34.32	1.26667	5	30
2019	Site 4	505	11	No	Mesh	Site 4-Mesh	Site 4-M1	4	59.63	48.93	Cnidaria	Eudendrium msp. 1	1	4.27	0.37	1	1
2019	Site 4	505	11	No	Mesh	Site 4-Mesh	Site 4-M1	5	50.66	49.06	Cnidaria	Campanulariidae msp. 2	8	12.2033	0.843333	5	25
2019	Site 4	505	11	No	Mesh	Site 4-Mesh	Site 4-M1	5	50.66	49.06	Cnidaria	Eudendrium msp. 1	3	4.75	0.49	5	5
2019	Site 4	505	11	No	Mesh	Site 4-Mesh	Site 4-M1	5	50.66	49.06	Cnidaria	Campanulariidae msp. 3	430.799	1.62667	0.36	5	5
2019	Site 4	505	11	No	Mesh	Site 4-Mesh	Site 4-M1	5	50.66	49.06	Cnidaria	Campanulariidae msp. 4	5	10.18	0.24	1	5
2019	Site 4	505	11	No	Mesh	Site 4-Mesh	Site 4-M1	6	49.57	51.01	Cnidaria	Campanulariidae msp. 3	699.57	3.22333	0.406667	10	5
2019	Site 4	505	11	No	Mesh	Site 4-Mesh	Site 4-M1	6	49.57	51.01	Cnidaria	Eudendrium msp. 1	10	9.39333	0.476667	5	5
2019	Site 4	505	11	No	Mesh	Site 4-Mesh	Site 4-M1	6	49.57	51.01	Cnidaria	Campanulariidae msp. 2	2		1.21	1	5
2019	Site 4	505	11	No	Mesh	Site 4-Mesh	Site 4-M1	Internal	49.57	51.01	Arthropoda	Copepoda msp. 1	3	3.69	1.20333
2019	Site 4	505	11	No	Mesh	Site 4-Mesh	Site 4-M1	Internal	49.57	51.01	Unknown	Unknown msp. 2	2		0.06
2019	Site 4	505	11	No	Mesh	Site 4-Mesh	Site 4-M1	Internal	49.57	51.01	Radiozoa	Radiozoa msp. 1	2		0.835
2019	Site 4	505	11	No	Mesh	Site 4-Mesh	Site 4-M1	Internal	49.57	51.01	Cnidaria	Campanulariidae msp. 2
2019	Site 4	505	11	No	Mesh	Site 4-Mesh	Site 4-M1	Internal	49.57	51.01	Cnidaria	Campanulariidae msp. 3
2019	Site 4	505	11	No	Mesh	Site 4-Mesh	Site 4-M1	Internal	49.57	51.01	Cnidaria	Campanulariidae msp. 4
2019	Site 4	505	11	No	Mesh	Site 4-Mesh	Site 4-M1	Internal	49.57	51.01	Cnidaria	Eudendrium msp. 1
2019	Site 4	505	11	No	Mesh	Site 4-Mesh	Site 4-M2	1	59.06	48.96	Cnidaria	Eudendrium msp. 1	375.905	6.58	0.58	15	20
2019	Site 4	505	11	No	Mesh	Site 4-Mesh	Site 4-M2	1	59.06	48.96	Cnidaria	Campanulariidae msp. 3	790.365	2.37667	0.373333	10	5
2019	Site 4	505	11	No	Mesh	Site 4-Mesh	Site 4-M2	1	59.06	48.96	Arthropoda	Isopoda msp. 1	9	0.43	0.19	5	0
2019	Site 4	505	11	No	Mesh	Site 4-Mesh	Site 4-M2	1	59.06	48.96	Cnidaria	Campanulariidae msp. 2	6	18.9067	1.37	5	10
2019	Site 4	505	11	No	Mesh	Site 4-Mesh	Site 4-M2	1	59.06	48.96	Foraminifera	Foraminifera msp. 3	1		0.27	1	0
2019	Site 4	505	11	No	Mesh	Site 4-Mesh	Site 4-M2	2	51.98	49.8	Cnidaria	Eudendrium msp. 1	595.379	5.1	0.61	10	15
2019	Site 4	505	11	No	Mesh	Site 4-Mesh	Site 4-M2	2	51.98	49.8	Cnidaria	Campanulariidae msp. 3	1535.91	2.10333	0.366667	10	15
2019	Site 4	505	11	No	Mesh	Site 4-Mesh	Site 4-M2	2	51.98	49.8	Arthropoda	Copepoda msp. 1	4	4.42	1.325	5	0
2019	Site 4	505	11	No	Mesh	Site 4-Mesh	Site 4-M2	2	51.98	49.8	Cnidaria	Campanulariidae msp. 2	8		0.97	5	20
2019	Site 4	505	11	No	Mesh	Site 4-Mesh	Site 4-M2	2	51.98	49.8	Arthropoda	Caprellidae msp. 1	18	1.73667	0.23	0	5
2019	Site 4	505	11	No	Mesh	Site 4-Mesh	Site 4-M2	3	64.24	49.21	Cnidaria	Eudendrium msp. 1	49	5.37333	0.533333	5	5
2019	Site 4	505	11	No	Mesh	Site 4-Mesh	Site 4-M2	3	64.24	49.21	Cnidaria	Campanulariidae msp. 3	727.088	4.36333	0.353333	5	5
2019	Site 4	505	11	No	Mesh	Site 4-Mesh	Site 4-M2	3	64.24	49.21	Cnidaria	Campanulariidae msp. 2	2	5.19	0.625	1	1
2019	Site 4	505	11	No	Mesh	Site 4-Mesh	Site 4-M2	3	64.24	49.21	Foraminifera	Foraminifera msp. 1	2		0.64	1	0
2019	Site 4	505	11	No	Mesh	Site 4-Mesh	Site 4-M2	4	52.3	48.27	Arthropoda	Copepoda msp. 1	1	3.15	1.04	1	0
2019	Site 4	505	11	No	Mesh	Site 4-Mesh	Site 4-M2	4	52.3	48.27	Cnidaria	Octocorallia msp. 1	1		1.29	1	0
2019	Site 4	505	11	No	Mesh	Site 4-Mesh	Site 4-M2	4	52.3	48.27	Foraminifera	Foraminifera msp. 1	1		0.59	1	0
2019	Site 4	505	11	No	Mesh	Site 4-Mesh	Site 4-M2	5	49.55	51.28	Cnidaria	Campanulariidae msp. 2	12			5	15
2019	Site 4	505	11	No	Mesh	Site 4-Mesh	Site 4-M2	5	49.55	51.28	Cnidaria	Campanulariidae msp. 3	1338.22	2.72667	0.35	5	5
2019	Site 4	505	11	No	Mesh	Site 4-Mesh	Site 4-M2	6	48.95	50.42	Cnidaria	Eudendrium msp. 1	756.871	7.57333	0.646667	15	10
2019	Site 4	505	11	No	Mesh	Site 4-Mesh	Site 4-M2	6	48.95	50.42	Cnidaria	Campanulariidae msp. 3	320.848	4.67	0.493333	10	5
2019	Site 4	505	11	No	Mesh	Site 4-Mesh	Site 4-M2	6	48.95	50.42	Arthropoda	Caprellidae msp. 1	1	16.31	0.84	5	5
2019	Site 4	505	11	No	Mesh	Site 4-Mesh	Site 4-M2	6	48.95	50.42	Cnidaria	Octocorallia msp. 1	1		1.24	1	0
2019	Site 4	505	11	No	Mesh	Site 4-Mesh	Site 4-M2	Internal	48.95	50.42	Arthropoda	Copepoda msp. 1	3	4.5	1.265
2019	Site 4	505	11	No	Mesh	Site 4-Mesh	Site 4-M2	Internal	48.95	50.42	Cnidaria	Octocorallia msp. 1	1		1.1
2019	Site 4	505	11	No	Mesh	Site 4-Mesh	Site 4-M2	Internal	48.95	50.42	Cnidaria	Campanulariidae msp. 2
2019	Site 4	505	11	No	Mesh	Site 4-Mesh	Site 4-M2	Internal	48.95	50.42	Cnidaria	Campanulariidae msp. 3
2019	Site 4	505	11	No	Mesh	Site 4-Mesh	Site 4-M3	1	54.26	56.17	Cnidaria	Eudendrium msp. 2	934.654		0.636667	90	100
2019	Site 4	505	11	No	Mesh	Site 4-Mesh	Site 4-M3	1	54.26	56.17	Foraminifera	Foraminifera msp. 1	1		0.71	1	0
2019	Site 4	505	11	No	Mesh	Site 4-Mesh	Site 4-M3	2	63.1	52.51	Cnidaria	Eudendrium msp. 2	817.301	17.02	0.223333	50	70
2019	Site 4	505	11	No	Mesh	Site 4-Mesh	Site 4-M3	2	63.1	52.51	Cnidaria	Eudendrium msp. 1	1			1	1
2019	Site 4	505	11	No	Mesh	Site 4-Mesh	Site 4-M3	2	63.1	52.51	Mollusca	Gastropoda msp. 2	34	1.34333	11.5567	0	5
2019	Site 4	505	11	No	Mesh	Site 4-Mesh	Site 4-M3	2	63.1	52.51	Foraminifera	Foraminifera msp. 1	1		0.75	0	1
2019	Site 4	505	11	No	Mesh	Site 4-Mesh	Site 4-M3	3	47.52	51.99	Cnidaria	Eudendrium msp. 2	100	9.18	0.17	10	15
2019	Site 4	505	11	No	Mesh	Site 4-Mesh	Site 4-M3	3	47.52	51.99	Arthropoda	Copepoda msp. 1	3	3.35667	1.21	5	0
2019	Site 4	505	11	No	Mesh	Site 4-Mesh	Site 4-M3	3	47.52	51.99	Cnidaria	Campanulariidae msp. 3	21	3.47667	0.446667	5	5
2019	Site 4	505	11	No	Mesh	Site 4-Mesh	Site 4-M3	3	47.52	51.99	Arthropoda	Ostracoda msp. 1	1	3.62	1.16	1	0
2019	Site 4	505	11	No	Mesh	Site 4-Mesh	Site 4-M3	3	47.52	51.99	Cnidaria	Campanulariidae msp. 2	2	12.84	1.03	1	5
2019	Site 4	505	11	No	Mesh	Site 4-Mesh	Site 4-M3	3	47.52	51.99	Cnidaria	Eudendrium msp. 1	4			1	5
2019	Site 4	505	11	No	Mesh	Site 4-Mesh	Site 4-M3	4	59.83	52.15	Cnidaria	Eudendrium msp. 2	1060.85		0.226667	70	80
2019	Site 4	505	11	No	Mesh	Site 4-Mesh	Site 4-M3	4	59.83	52.15	Foraminifera	Foraminifera msp. 1	1		0.37	0	1
2019	Site 4	505	11	No	Mesh	Site 4-Mesh	Site 4-M3	5	50.77	52.74	Cnidaria	Eudendrium msp. 2	776.507		0.17	80	90
2019	Site 4	505	11	No	Mesh	Site 4-Mesh	Site 4-M3	5	50.77	52.74	Arthropoda	Copepoda msp. 1	1	3.38	1.14	1	0
2019	Site 4	505	11	No	Mesh	Site 4-Mesh	Site 4-M3	5	50.77	52.74	Cnidaria	Campanulariidae msp. 2	1	21.875	0.76	1	5
2019	Site 4	505	11	No	Mesh	Site 4-Mesh	Site 4-M3	5	50.77	52.74	Foraminifera	Foraminifera msp. 1	1		0.42	1	0
2019	Site 4	505	11	No	Mesh	Site 4-Mesh	Site 4-M3	6	52.3	54.08	Cnidaria	Eudendrium msp. 2	707.096	16.06	0.453333	70	80
2019	Site 4	505	11	No	Mesh	Site 4-Mesh	Site 4-M3	Internal	52.3	54.08	Arthropoda	Copepoda msp. 1	3	5.29	0.99
2019	Site 4	505	11	No	Mesh	Site 4-Mesh	Site 4-M3	Internal	52.3	54.08	Cnidaria	Campanulariidae msp. 2
2019	Site 4	505	11	No	Mesh	Site 4-Mesh	Site 4-M3	Internal	52.3	54.08	Cnidaria	Eudendrium msp. 2
2019	Site 4	505	11	No	Plastic	Site 4-Plastic	Site 4-P1	1	43.55	43.97	Cnidaria	Eudendrium msp. 1	102.128		0.376667	5	10
2019	Site 4	505	11	No	Plastic	Site 4-Plastic	Site 4-P1	1	43.55	43.97	Cnidaria	Actinaria msp. 1	1	0.79	3.55	1	0
2019	Site 4	505	11	No	Plastic	Site 4-Plastic	Site 4-P1	1	43.55	43.97	Cnidaria	Campanulariidae msp. 2	1	11.13	0.61	1	5
2019	Site 4	505	11	No	Plastic	Site 4-Plastic	Site 4-P1	1	43.55	43.97	Radiozoa	Radiozoa msp. 1	1		0.81	1	0
2019	Site 4	505	11	No	Plastic	Site 4-Plastic	Site 4-P1	2	44.42	44.68	Cnidaria	Campanulariidae msp. 3	1296.66	2.74667	0.24	30	10
2019	Site 4	505	11	No	Plastic	Site 4-Plastic	Site 4-P1	2	44.42	44.68	Cnidaria	Campanulariidae msp. 2	8			5	5
2019	Site 4	505	11	No	Plastic	Site 4-Plastic	Site 4-P1	2	44.42	44.68	Cnidaria	Eudendrium msp. 1	92.6187		0.6	5	20
2019	Site 4	505	11	No	Plastic	Site 4-Plastic	Site 4-P1	3	44.65	45.64	Cnidaria	Campanulariidae msp. 3	1630.26	1.3	0.246667	70	20
2019	Site 4	505	11	No	Plastic	Site 4-Plastic	Site 4-P1	3	44.65	45.64	Cnidaria	Campanulariidae msp. 2	19			5	30
2019	Site 4	505	11	No	Plastic	Site 4-Plastic	Site 4-P1	3	44.65	45.64	Cnidaria	Eudendrium msp. 1	33.9638		0.646667	1	5
2019	Site 4	505	11	No	Plastic	Site 4-Plastic	Site 4-P1	3	44.65	45.64	Cnidaria	Octocorallia msp. 1	1	0.08	1.43	1	0
2019	Site 4	505	11	No	Plastic	Site 4-Plastic	Site 4-P1	4	44.44	44.31	Cnidaria	Campanulariidae msp. 3	1201.17	1.48667	0.313333	30	10
2019	Site 4	505	11	No	Plastic	Site 4-Plastic	Site 4-P1	4	44.44	44.31	Cnidaria	Campanulariidae msp. 2	14			10	20
2019	Site 4	505	11	No	Plastic	Site 4-Plastic	Site 4-P1	4	44.44	44.31	Cnidaria	Eudendrium msp. 1	72.2017		0.493333	5	20
2019	Site 4	505	11	No	Plastic	Site 4-Plastic	Site 4-P1	5	44.68	44.31	Cnidaria	Campanulariidae msp. 3	300			20	10
2019	Site 4	505	11	No	Plastic	Site 4-Plastic	Site 4-P1	5	44.68	44.31	Cnidaria	Campanulariidae msp. 2	12	13.99	0.7	5	10
2019	Site 4	505	11	No	Plastic	Site 4-Plastic	Site 4-P1	5	44.68	44.31	Cnidaria	Campanulariidae msp. 2 low	1075.68	1.07	0.263333	5	10
2019	Site 4	505	11	No	Plastic	Site 4-Plastic	Site 4-P1	5	44.68	44.31	Cnidaria	Eudendrium msp. 1	52.7939		0.483333	5	20
2019	Site 4	505	11	No	Plastic	Site 4-Plastic	Site 4-P1	5	44.68	44.31	Arthropoda	Copepoda msp. 1	1	3.69	1.29	1	0
2019	Site 4	505	11	No	Plastic	Site 4-Plastic	Site 4-P1	6	43.88	44.23	Cnidaria	Campanulariidae msp. 3	970.406	2.43667	0.363333	20	5
2019	Site 4	505	11	No	Plastic	Site 4-Plastic	Site 4-P1	6	43.88	44.23	Cnidaria	Campanulariidae msp. 2	18			10	30
2019	Site 4	505	11	No	Plastic	Site 4-Plastic	Site 4-P1	6	43.88	44.23	Cnidaria	Eudendrium msp. 1	64.6937		0.526667	5	30
2019	Site 4	505	11	No	Plastic	Site 4-Plastic	Site 4-P2	1	44.35	45.02	Cnidaria	Eudendrium msp. 1	99.8319		0.54	40	90
2019	Site 4	505	11	No	Plastic	Site 4-Plastic	Site 4-P2	1	44.35	45.02	Cnidaria	Campanulariidae msp. 3	159.731	1.11667	0.216667	25	10
2019	Site 4	505	11	No	Plastic	Site 4-Plastic	Site 4-P2	1	44.35	45.02	Cnidaria	Campanulariidae msp. 2	6			5	5
2019	Site 4	505	11	No	Plastic	Site 4-Plastic	Site 4-P2	2	45.18	45.74	Cnidaria	Campanulariidae msp. 3	234.207	1.89	0.22	25	10
2019	Site 4	505	11	No	Plastic	Site 4-Plastic	Site 4-P2	2	45.18	45.74	Cnidaria	Eudendrium msp. 1	123.992		0.523333	20	80
2019	Site 4	505	11	No	Plastic	Site 4-Plastic	Site 4-P2	2	45.18	45.74	Cnidaria	Campanulariidae msp. 2	2			5	5
2019	Site 4	505	11	No	Plastic	Site 4-Plastic	Site 4-P2	2	45.18	45.74	Arthropoda	Caprellidae msp. 1	1	17.18	1.69	0	5
2019	Site 4	505	11	No	Plastic	Site 4-Plastic	Site 4-P2	3	44.22	44.13	Cnidaria	Campanulariidae msp. 3	175.629	1.71	0.236667	20	5
2019	Site 4	505	11	No	Plastic	Site 4-Plastic	Site 4-P2	3	44.22	44.13	Cnidaria	Eudendrium msp. 1	32.5238		0.286667	5	15
2019	Site 4	505	11	No	Plastic	Site 4-Plastic	Site 4-P2	3	44.22	44.13	Cnidaria	Campanulariidae msp. 2	1			1	5
2019	Site 4	505	11	No	Plastic	Site 4-Plastic	Site 4-P2	4	45.59	45.51	Cnidaria	Eudendrium msp. 1	82.992		0.473333	20	50
2019	Site 4	505	11	No	Plastic	Site 4-Plastic	Site 4-P2	4	45.59	45.51	Cnidaria	Campanulariidae msp. 3	1825.82	0.23	0.153333	20	5
2019	Site 4	505	11	No	Plastic	Site 4-Plastic	Site 4-P2	4	45.59	45.51	Cnidaria	Campanulariidae msp. 2	5			5	5
2019	Site 4	505	11	No	Plastic	Site 4-Plastic	Site 4-P2	5	44.68	44.05	Cnidaria	Eudendrium msp. 1	78.7262		0.55	15	20
2019	Site 4	505	11	No	Plastic	Site 4-Plastic	Site 4-P2	5	44.68	44.05	Cnidaria	Campanulariidae msp. 3	164.013	1.30333	0.29	10	5
2019	Site 4	505	11	No	Plastic	Site 4-Plastic	Site 4-P2	5	44.68	44.05	Cnidaria	Campanulariidae msp. 2	2			5	5
2019	Site 4	505	11	No	Plastic	Site 4-Plastic	Site 4-P2	6	43.09	43.94	Cnidaria	Campanulariidae msp. 3	460.721	0.803333	0.176667	20	10
2019	Site 4	505	11	No	Plastic	Site 4-Plastic	Site 4-P2	6	43.09	43.94	Cnidaria	Eudendrium msp. 1	126.225		0.393333	10	40
2019	Site 4	505	11	No	Plastic	Site 4-Plastic	Site 4-P2	6	43.09	43.94	Cnidaria	Campanulariidae msp. 2	2			5	10
2019	Site 4	505	11	No	Plastic	Site 4-Plastic	Site 4-P3	1	44.24	43.65	Cnidaria	Campanulariidae msp. 3	695.187			20	5
2019	Site 4	505	11	No	Plastic	Site 4-Plastic	Site 4-P3	1	44.24	43.65	Cnidaria	Campanulariidae msp. 2	17			5	30
2019	Site 4	505	11	No	Plastic	Site 4-Plastic	Site 4-P3	1	44.24	43.65	Cnidaria	Eudendrium msp. 1	38.6215	19.035	0.453333	5	10
2019	Site 4	505	11	No	Plastic	Site 4-Plastic	Site 4-P3	2	43.53	43.89	Cnidaria	Eudendrium msp. 1	82.7897	7.19	0.333333	15	25
2019	Site 4	505	11	No	Plastic	Site 4-Plastic	Site 4-P3	2	43.53	43.89	Cnidaria	Campanulariidae msp. 3	757.844	0.87	0.206667	10	5
2019	Site 4	505	11	No	Plastic	Site 4-Plastic	Site 4-P3	2	43.53	43.89	Cnidaria	Campanulariidae msp. 2	2			1	5
2019	Site 4	505	11	No	Plastic	Site 4-Plastic	Site 4-P3	3	43.87	43.85	Cnidaria	Campanulariidae msp. 3	218.019	0.723333	0.223333	15	5
2019	Site 4	505	11	No	Plastic	Site 4-Plastic	Site 4-P3	3	43.87	43.85	Cnidaria	Eudendrium msp. 1	102.597	9.33	0.46	10	15
2019	Site 4	505	11	No	Plastic	Site 4-Plastic	Site 4-P3	3	43.87	43.85	Cnidaria	Campanulariidae msp. 2	1			5	5
2019	Site 4	505	11	No	Plastic	Site 4-Plastic	Site 4-P3	4	43.35	43.11	Cnidaria	Campanulariidae msp. 3	186.882	0.783333	0.17	25	10
2019	Site 4	505	11	No	Plastic	Site 4-Plastic	Site 4-P3	4	43.35	43.11	Cnidaria	Eudendrium msp. 1	205.57		0.44	20	40
2019	Site 4	505	11	No	Plastic	Site 4-Plastic	Site 4-P3	4	43.35	43.11	Cnidaria	Campanulariidae msp. 2	1			5	5
2019	Site 4	505	11	No	Plastic	Site 4-Plastic	Site 4-P3	5	43.21	43.21	Cnidaria	Campanulariidae msp. 3	342.302	1.01	0.173333	20	10
2019	Site 4	505	11	No	Plastic	Site 4-Plastic	Site 4-P3	5	43.21	43.21	Cnidaria	Campanulariidae msp. 2	3			5	10
2019	Site 4	505	11	No	Plastic	Site 4-Plastic	Site 4-P3	5	43.21	43.21	Cnidaria	Eudendrium msp. 1	56.0131	11.91	0.37	5	20
2019	Site 4	505	11	No	Plastic	Site 4-Plastic	Site 4-P3	5	43.21	43.21	Arthropoda	Copepoda msp. 1	1	4.62	1.87	1
2019	Site 4	505	11	No	Plastic	Site 4-Plastic	Site 4-P3	6	43.51	44.1	Cnidaria	Campanulariidae msp. 3	63.9597	1.08	0.253333	20	5
2019	Site 4	505	11	No	Plastic	Site 4-Plastic	Site 4-P3	6	43.51	44.1	Cnidaria	Campanulariidae msp. 2	2			10	15
2019	Site 4	505	11	No	Plastic	Site 4-Plastic	Site 4-P3	6	43.51	44.1	Cnidaria	Eudendrium msp. 1	89.5436	13.66	0.43	10	50
2019	Site 4	505	11	No	Stone	Site 4-Stone	Site 4-S1	1	45.75	46.39	Cnidaria	Campanulariidae msp. 3	2072.82	4.60167	0.491667	50	35
2019	Site 4	505	11	No	Stone	Site 4-Stone	Site 4-S1	1	45.75	46.39	Cnidaria	Campanulariidae msp. 2	11		1.22	5	10
2019	Site 4	505	11	No	Stone	Site 4-Stone	Site 4-S1	1	45.75	46.39	Cnidaria	Campanulariidae msp. 2 low	101	0.836667	0.333333	5	10
2019	Site 4	505	11	No	Stone	Site 4-Stone	Site 4-S1	2	44.69	47.32	Cnidaria	Campanulariidae msp. 3	118	4.53333	0.501667	45	30
2019	Site 4	505	11	No	Stone	Site 4-Stone	Site 4-S1	2	44.69	47.32	Cnidaria	Campanulariidae msp. 2	3		0.826667	5	5
2019	Site 4	505	11	No	Stone	Site 4-Stone	Site 4-S1	2	44.69	47.32	Foraminifera	Foraminifera msp. 2	1		0.23	1	0
2019	Site 4	505	11	No	Stone	Site 4-Stone	Site 4-S1	2	44.69	47.32	Cnidaria	Octocorallia msp. 1	1	1.48	1.09	1	0
2019	Site 4	505	11	No	Stone	Site 4-Stone	Site 4-S1	2	44.69	47.32	Cnidaria	Octocorallia msp. 1	1		0.82	1	0
2019	Site 4	505	11	No	Stone	Site 4-Stone	Site 4-S1	2	44.69	47.32	Radiozoa	Radiozoa msp. 1	1		0.6	1	0
2019	Site 4	505	11	No	Stone	Site 4-Stone	Site 4-S1	3	44.94	46.36	Cnidaria	Campanulariidae msp. 3	66	0.703333	0.11	5	5
2019	Site 4	505	11	No	Stone	Site 4-Stone	Site 4-S1	4	45.79	46.84	Cnidaria	Campanulariidae msp. 2	3		0.305	5	15
2019	Site 4	505	11	No	Stone	Site 4-Stone	Site 4-S1	4	45.79	46.84	Cnidaria	Campanulariidae msp. 3	5	0.618333	0.111667	5	5
2019	Site 4	505	11	No	Stone	Site 4-Stone	Site 4-S1	5	46.18	47.73	Cnidaria	Campanulariidae msp. 3	208	0.99	0.116667	10	5
2019	Site 4	505	11	No	Stone	Site 4-Stone	Site 4-S1	5	46.18	47.73	Cnidaria	Campanulariidae msp. 2	4		0.336667	5	5
2019	Site 4	505	11	No	Stone	Site 4-Stone	Site 4-S1	6	47.53	46.27	Cnidaria	Campanulariidae msp. 3	286.567	1.27333	0.178333	25	15
2019	Site 4	505	11	No	Stone	Site 4-Stone	Site 4-S1	6	47.53	46.27	Cnidaria	Campanulariidae msp. 2	2	5.815	0.305	5	5
2019	Site 4	505	11	No	Stone	Site 4-Stone	Site 4-S1	6	47.53	46.27	Cnidaria	Eudendrium msp. 1	1	1.57	0.11	0	1
2019	Site 4	505	11	No	Stone	Site 4-Stone	Site 4-S2	1	48.36	47.39	Cnidaria	Campanulariidae msp. 3	2135.94	3.29667	0.353333	40	25
2019	Site 4	505	11	No	Stone	Site 4-Stone	Site 4-S2	1	48.36	47.39	Cnidaria	Eudendrium msp. 1	641.699	6.83667	0.61	10	15
2019	Site 4	505	11	No	Stone	Site 4-Stone	Site 4-S2	2	46.96	47.508	Cnidaria	Eudendrium msp. 1	14	2.73	0.566667	5	1
2019	Site 4	505	11	No	Stone	Site 4-Stone	Site 4-S2	2	46.96	47.508	Cnidaria	Campanulariidae msp. 3	38	2.97	0.543333	5	5
2019	Site 4	505	11	No	Stone	Site 4-Stone	Site 4-S2	3	46.69	46.87	Cnidaria	Campanulariidae msp. 3	1145.24	0.393333	0.176667	10	5
2019	Site 4	505	11	No	Stone	Site 4-Stone	Site 4-S2	3	46.69	46.87	Cnidaria	Eudendrium msp. 1	11	2.97	0.34	5	5
2019	Site 4	505	11	No	Stone	Site 4-Stone	Site 4-S2	3	46.69	46.87	Foraminifera	Foraminifera msp. 1	1		0.66	1	0
2019	Site 4	505	11	No	Stone	Site 4-Stone	Site 4-S2	4	46.77	46.48	Cnidaria	Campanulariidae msp. 3	1739.1	2.52667	0.413333	30	20
2019	Site 4	505	11	No	Stone	Site 4-Stone	Site 4-S2	4	46.77	46.48	Cnidaria	Eudendrium msp. 1	9	5.86	0.5	5	1
2019	Site 4	505	11	No	Stone	Site 4-Stone	Site 4-S2	5	46.96	47.2	Cnidaria	Eudendrium msp. 1	30	5.22333	0.65	20	20
2019	Site 4	505	11	No	Stone	Site 4-Stone	Site 4-S2	5	46.96	47.2	Cnidaria	Campanulariidae msp. 3	2393.83	2.39667	0.316667	20	15
2019	Site 4	505	11	No	Stone	Site 4-Stone	Site 4-S2	5	46.96	47.2	Cnidaria	Campanulariidae msp. 2	1		0.94	1	5
2019	Site 4	505	11	No	Stone	Site 4-Stone	Site 4-S2	5	46.96	47.2	Foraminifera	Foraminifera msp. 1	1		0.4	0	1
2019	Site 4	505	11	No	Stone	Site 4-Stone	Site 4-S2	6	47.35	47.59	Cnidaria	Campanulariidae msp. 3	2568.86	2.93667	0.536667	15	5
2019	Site 4	505	11	No	Stone	Site 4-Stone	Site 4-S3	1	49.23	47.54	Cnidaria	Campanulariidae msp. 3	310	3.67	0.373333	20	15
2019	Site 4	505	11	No	Stone	Site 4-Stone	Site 4-S3	1	49.23	47.54	Cnidaria	Campanulariidae msp. 2	34		1.21333	10	30
2019	Site 4	505	11	No	Stone	Site 4-Stone	Site 4-S3	1	49.23	47.54	Cnidaria	Campanulariidae msp. 2 low	795.734	0.816667	0.323333	5	5
2019	Site 4	505	11	No	Stone	Site 4-Stone	Site 4-S3	1	49.23	47.54	Cnidaria	Hydrozoa msp. 1	2		0.21	1	1
2019	Site 4	505	11	No	Stone	Site 4-Stone	Site 4-S3	2	47.5	47.23	Cnidaria	Campanulariidae msp. 3	42	0.863333	0.336667	5	5
2019	Site 4	505	11	No	Stone	Site 4-Stone	Site 4-S3	2	47.5	47.23	Annelida	Polychaeta msp. 1	1		0.26	1	0
2019	Site 4	505	11	No	Stone	Site 4-Stone	Site 4-S3	3	48.71	47.46	Cnidaria	Campanulariidae msp. 2	9			15	25
2019	Site 4	505	11	No	Stone	Site 4-Stone	Site 4-S3	3	48.71	47.46	Cnidaria	Campanulariidae msp. 3	4			10	10
2019	Site 4	505	11	No	Stone	Site 4-Stone	Site 4-S3	4	47.84	48.35	Cnidaria	Campanulariidae msp. 3	956.066	2.47333	0.393333	10	5
2019	Site 4	505	11	No	Stone	Site 4-Stone	Site 4-S3	4	47.84	48.35	Cnidaria	Campanulariidae msp. 2	8			5	10
2019	Site 4	505	11	No	Stone	Site 4-Stone	Site 4-S3	4	47.84	48.35	Cnidaria	Octocorallia msp. 1	1	0.95	0.48	1	0
2019	Site 4	505	11	No	Stone	Site 4-Stone	Site 4-S3	4	47.84	48.35	Foraminifera	Foraminifera msp. 1	1		0.47	1	0
2019	Site 4	505	11	No	Stone	Site 4-Stone	Site 4-S3	5	48.74	47.07	Cnidaria	Campanulariidae msp. 3	191.183	1.66667	0.433333	5	5
2019	Site 4	505	11	No	Stone	Site 4-Stone	Site 4-S3	6	47.53	46.77	Cnidaria	Campanulariidae msp. 3	1244.87	1.59667	0.356667	10	5
2019	Site 4	505	11	No	Stone	Site 4-Stone	Site 4-S3	6	47.53	46.77	Cnidaria	Campanulariidae msp. 2	3		0.69	5	15
2019	Site 4	505	11	No	Stone	Site 4-Stone	Site 4-S3	6	47.53	46.77	Unknown	Unknown msp. 1	1		0.18	1	0
2019	Site 4	505	11	No	Stone	Site 4-Stone	Site 4-S3	6	47.53	46.77	Foraminifera	Foraminifera msp. 1	1		0.83	1	0
2019	Site 4	505	11	No	Stone	Site 4-Stone	Site 4-S3	6	47.53	46.77	Unknown	Unknown msp. 1	1		0.18	0	1
2019	Site 4	505	11	No	Wood	Site 4-Wood	Site 4-W	1	200	48	Cnidaria	Campanulariidae msp. 3	500			80	65
2019	Site 4	505	11	No	Wood	Site 4-Wood	Site 4-W	1	200	48	Cnidaria	Campanulariidae msp. 2 low	850			50	0
2019	Site 4	505	11	No	Wood	Site 4-Wood	Site 4-W	1	200	48	Cnidaria	Campanulariidae msp. 2	46			40	80
2019	Site 4	505	11	No	Wood	Site 4-Wood	Site 4-W	1	200	48	Cnidaria	Eudendrium msp. 1	20			10	10
2019	Site 4	505	11	No	Wood	Site 4-Wood	Site 4-W	1	200	48	Arthropoda	Copepoda msp. 1	1			1	0
2019	Site 4	505	11	No	Wood	Site 4-Wood	Site 4-W	2	200	53	Cnidaria	Campanulariidae msp. 3	250			50	40
2019	Site 4	505	11	No	Wood	Site 4-Wood	Site 4-W	2	200	53	Cnidaria	Campanulariidae msp. 2	22			20	30
2019	Site 4	505	11	No	Wood	Site 4-Wood	Site 4-W	2	200	53	Cnidaria	Eudendrium msp. 1	5			5	5
2019	Site 4	505	11	No	Wood	Site 4-Wood	Site 4-W	3	200	48	Cnidaria	Campanulariidae msp. 3	680			75	55
2019	Site 4	505	11	No	Wood	Site 4-Wood	Site 4-W	3	200	48	Cnidaria	Eudendrium msp. 1	65			35	25
2019	Site 4	505	11	No	Wood	Site 4-Wood	Site 4-W	3	200	48	Cnidaria	Campanulariidae msp. 2	4			5	15
2019	Site 4	505	11	No	Wood	Site 4-Wood	Site 4-W	5	53	48	Cnidaria	Campanulariidae msp. 3	50			30	25
2019	Site 4	505	11	No	Wood	Site 4-Wood	Site 4-W	5	53	48	Cnidaria	Campanulariidae msp. 2	1			1	5
2019	Site 4	505	11	No	Wood	Site 4-Wood	Site 4-W	5	53	48	Cnidaria	Eudendrium msp. 1	1			1	1
2019	Site 4	505	11	No	Wood	Site 4-Wood	Site 4-W	6	53	48	Cnidaria	Campanulariidae msp. 3	30			25	15
2018	Site 2	960	60	Yes	Mesh	Site 2-Mesh	Site 2-M1	All	57.51	49.99	Cnidaria	Campanulariidae msp. 3	25	3.054	0.516	15	10
2018	Site 2	960	60	Yes	Mesh	Site 2-Mesh	Site 2-M1	All	57.51	49.99	Arthropoda	Copepoda msp. 1	3	1.875	0.81	1	0
2018	Site 2	960	60	Yes	Mesh	Site 2-Mesh	Site 2-M1	All	57.51	49.99	Foraminifera	Foraminifera msp. 3	1		0.51	1	0
2018	Site 2	960	60	Yes	Mesh	Site 2-Mesh	Site 2-M1	All	57.51	49.99	Foraminifera	Foraminifera msp. 1	2		0.475	1	0
2018	Site 2	960	60	Yes	Mesh	Site 2-Mesh	Site 2-M2	All	57.51	49.99	Cnidaria	Campanulariidae msp. 3	28	1.982	0.446	10	5
2018	Site 2	960	60	Yes	Mesh	Site 2-Mesh	Site 2-M2	All	57.51	49.99	Arthropoda	Copepoda msp. 1	4	2.7925	0.73	1	0
2018	Site 2	960	60	Yes	Mesh	Site 2-Mesh	Site 2-M2	All	57.51	49.99	Radiozoa	Radiozoa msp. 1	1		0.81	1	0
2018	Site 2	960	60	Yes	Mesh	Site 2-Mesh	Site 2-M2	All	57.51	49.99	Foraminifera	Foraminifera msp. 1	2		0.23	1	0
2018	Site 2	960	60	Yes	Mesh	Site 2-Mesh	Site 2-M3	2	56.7	49.96	Arthropoda	Copepoda msp. 1	1	6.46	2.16	5
2018	Site 2	960	60	Yes	Mesh	Site 2-Mesh	Site 2-M3	2	56.7	49.96	Foraminifera	Foraminifera msp. 1	1		4.06	1
2018	Site 2	960	60	Yes	Mesh	Site 2-Mesh	Site 2-M3	3	65.01	50.51	Cnidaria	Campanulariidae msp. 3	46	2.63	0.483333	5	5
2018	Site 2	960	60	Yes	Mesh	Site 2-Mesh	Site 2-M3	4	58.97	51.63	Cnidaria	Campanulariidae msp. 3	55	1.93667	0.483333	5	5
2018	Site 2	960	60	Yes	Mesh	Site 2-Mesh	Site 2-M3	4	58.97	51.63	Arthropoda	Copepoda msp. 1	4	1.89667	3.39333	1
2018	Site 2	960	60	Yes	Mesh	Site 2-Mesh	Site 2-M3	6	46.1	48.8	Porifera	Porifera msp. 2	1		0.58	1
2018	Site 2	960	60	Yes	Mesh	Site 2-Mesh	Site 2-M3	Internal	46.1	48.8	Cnidaria	Campanulariidae msp. 3
2018	Site 2	960	60	Yes	Mesh	Site 2-Mesh	Site 2-M3	Internal	46.1	48.8	Arthropoda	Copepoda msp. 1	8	3.80333	1.45667
2018	Site 2	960	60	Yes	Plastic	Site 2-Plastic	Site 2-P1	1	44.21	43.19	Cnidaria	Campanulariidae msp. 3	426.439	0.476667	0.2	5	0
2018	Site 2	960	60	Yes	Plastic	Site 2-Plastic	Site 2-P1	3	43.74	43.76	Cnidaria	Campanulariidae msp. 3	325.391	0.453333	0.176667	15	0
2018	Site 2	960	60	Yes	Plastic	Site 2-Plastic	Site 2-P1	4	43.5	43.6	Cnidaria	Campanulariidae msp. 3	594.268	1.06333	0.196667	10	5
2018	Site 2	960	60	Yes	Plastic	Site 2-Plastic	Site 2-P1	5	43.59	44.18	Cnidaria	Campanulariidae msp. 3	686.871	0.546667	0.216667	10	0
2018	Site 2	960	60	Yes	Plastic	Site 2-Plastic	Site 2-P1	6	43.4	43.6	Cnidaria	Campanulariidae msp. 3	435.215	1.07667	0.283333	10	0
2018	Site 2	960	60	Yes	Plastic	Site 2-Plastic	Site 2-P2	1	43.11	43.41	Cnidaria	Campanulariidae msp. 3	1540.79	0.423333	0.15	20	1
2018	Site 2	960	60	Yes	Plastic	Site 2-Plastic	Site 2-P2	2	43.06	43.69	Cnidaria	Campanulariidae msp. 3	1354.53	0.39	0.163333	30	5
2018	Site 2	960	60	Yes	Plastic	Site 2-Plastic	Site 2-P2	4	43.31	43.78	Cnidaria	Campanulariidae msp. 3	834.289	0.366667	0.146667	10	1
2018	Site 2	960	60	Yes	Plastic	Site 2-Plastic	Site 2-P2	4	43.31	43.78	Arthropoda	Copepoda msp. 1	1	3.71	0.99	1	0
2018	Site 2	960	60	Yes	Plastic	Site 2-Plastic	Site 2-P2	5	43.25	43.12	Cnidaria	Campanulariidae msp. 3	1591.42	0.51	0.2	10	1
2018	Site 2	960	60	Yes	Plastic	Site 2-Plastic	Site 2-P2	6	43.63	43.99	Cnidaria	Campanulariidae msp. 3	230.314	1.22333	0.363333	20	5
2018	Site 2	960	60	Yes	Plastic	Site 2-Plastic	Site 2-P3	2	43.31	42.98	Cnidaria	Campanulariidae msp. 3	1222.36	0.46	0.233333	10	1
2018	Site 2	960	60	Yes	Plastic	Site 2-Plastic	Site 2-P3	3	42.82	43.25	Cnidaria	Campanulariidae msp. 3	1055.62	1.10667	0.22	20	5
2018	Site 2	960	60	Yes	Plastic	Site 2-Plastic	Site 2-P3	4	43.04	43.36	Cnidaria	Campanulariidae msp. 3	472.774	0.48	0.16	10	0
2018	Site 2	960	60	Yes	Plastic	Site 2-Plastic	Site 2-P3	5	43.3	43.8	Cnidaria	Campanulariidae msp. 3	360.343	0.403333	0.19	5	0
2018	Site 2	960	60	Yes	Plastic	Site 2-Plastic	Site 2-P3	6	43.45	44.03	Cnidaria	Campanulariidae msp. 3	1001.19	0.573333	0.176667	5	0
2018	Site 2	960	60	Yes	Stone	Site 2-Stone	Site 2-S1	1	46.29	49.91	Cnidaria	Campanulariidae msp. 3	1	2.57	0.46	20	10
2018	Site 2	960	60	Yes	Stone	Site 2-Stone	Site 2-S1	1	46.29	49.91	Cnidaria	Campanulariidae msp. 1	1		0.05	1	0
2018	Site 2	960	60	Yes	Stone	Site 2-Stone	Site 2-S1	3	47.08	50.71	Cnidaria	Campanulariidae msp. 1	1	1.139	0.00733333	5	5
2018	Site 2	960	60	Yes	Stone	Site 2-Stone	Site 2-S1	3	47.08	50.71	Cnidaria	Campanulariidae msp. 3	1	0.823	0.114667	5	5
2018	Site 2	960	60	Yes	Stone	Site 2-Stone	Site 2-S1	4	47.35	52.12	Cnidaria	Campanulariidae msp. 1	1	1.29	0.035	5	5
2018	Site 2	960	60	Yes	Stone	Site 2-Stone	Site 2-S1	4	47.35	52.12	Cnidaria	Campanulariidae msp. 3	1	1.71333	0.0976667	5	5
2018	Site 2	960	60	Yes	Stone	Site 2-Stone	Site 2-S1	5	50.12	51.45	Cnidaria	Campanulariidae msp. 1	1	0.712	0.0496667	5	5
2018	Site 2	960	60	Yes	Stone	Site 2-Stone	Site 2-S1	6	51.91	50.02	Cnidaria	Campanulariidae msp. 1	1	0.935667	0.0373333	5	5
2018	Site 2	960	60	Yes	Stone	Site 2-Stone	Site 2-S2	1	46.97	51.075	Cnidaria	Campanulariidae msp. 1	1		0.0566667	1	0
2018	Site 2	960	60	Yes	Stone	Site 2-Stone	Site 2-S2	3	46.87	50.18	Cnidaria	Campanulariidae msp. 1	1		0.06	15	0
2018	Site 2	960	60	Yes	Stone	Site 2-Stone	Site 2-S2	4	46.63	48.06	Cnidaria	Campanulariidae msp. 1	1		0.0633333	5	0
2018	Site 2	960	60	Yes	Stone	Site 2-Stone	Site 2-S2	5	48.01	50.92	Cnidaria	Campanulariidae msp. 1	1	2.53	0.03	1	1
2018	Site 2	960	60	Yes	Stone	Site 2-Stone	Site 2-S2	6	47.78	49.96	Cnidaria	Campanulariidae msp. 1	1		0.0566667	10	0
2018	Site 2	960	60	Yes	Stone	Site 2-Stone	Site 2-S3	1	47.4	51.55	Radiozoa	Radiozoa msp. 1	1	0.254	0.106	1	0
2018	Site 2	960	60	Yes	Stone	Site 2-Stone	Site 2-S3	2	47.41	47.9	Unknown	Unknown msp. 1	2	0.129943	0.075551	1	0
2018	Site 2	960	60	Yes	Stone	Site 2-Stone	Site 2-S3	3	47.34	50.7	Cnidaria	Campanulariidae msp. 1	1	0.3097		5	5
2018	Site 2	960	60	Yes	Stone	Site 2-Stone	Site 2-S3	3	47.34	50.7	Cnidaria	Campanulariidae msp. 1	1	0.82	0.07	1	1
2018	Site 2	960	60	Yes	Stone	Site 2-Stone	Site 2-S3	6	46.795	50.73	Cnidaria	Campanulariidae msp. 1	1	0.580667	0.0616667	5	5
2018	Site 2	960	60	Yes	Wood	Site 2-Wood	Site 2-W	1	200	51	Cnidaria	Campanulariidae msp. 3	40	1.13667	0.72	5	5
2018	Site 2	960	60	Yes	Wood	Site 2-Wood	Site 2-W	2	200	30	Unknown	Unknown msp. 3	1		0.13	1	0
2018	Site 3	409	1	No	Mesh	Site 3-Mesh	Site 3-M1	2	49.59	50.52	Arthropoda	Gammaridea msp. 1	1	5.12	2.29	1	0
2018	Site 3	409	1	No	Mesh	Site 3-Mesh	Site 3-M1	2	49.59	50.52	Cnidaria	Campanulariidae msp. 2	1	1.15	0.34	1	1
2018	Site 3	409	1	No	Mesh	Site 3-Mesh	Site 3-M1	2	49.59	50.52	Cnidaria	Campanulariidae msp. 3	6			1	1
2018	Site 3	409	1	No	Mesh	Site 3-Mesh	Site 3-M1	2	49.59	50.52	Foraminifera	Foraminifera msp. 1	1		0.75	1	0
2018	Site 3	409	1	No	Mesh	Site 3-Mesh	Site 3-M1	3	53.1	48.78	Cnidaria	Campanulariidae msp. 2	1			1	1
2018	Site 3	409	1	No	Mesh	Site 3-Mesh	Site 3-M1	3	53.1	48.78	Cnidaria	Eudendrium msp. 1	1			1	1
2018	Site 3	409	1	No	Mesh	Site 3-Mesh	Site 3-M1	3	53.1	48.78	Porifera	Porifera msp. 1	1			5	0
2018	Site 3	409	1	No	Mesh	Site 3-Mesh	Site 3-M1	3	53.1	48.78	Foraminifera	Foraminifera msp. 1	9		0.583333	1	0
2018	Site 3	409	1	No	Mesh	Site 3-Mesh	Site 3-M1	4	48.43	51.56	Foraminifera	Foraminifera msp. 1	3		0.523333	1	0
2018	Site 3	409	1	No	Mesh	Site 3-Mesh	Site 3-M1	5	48.23	46.96	Foraminifera	Foraminifera msp. 1	4		0.473333	1	0
2018	Site 3	409	1	No	Mesh	Site 3-Mesh	Site 3-M1	6	49.27	48.14	Cnidaria	Campanulariidae msp. 2	1	1.45	0.48	1	1
2018	Site 3	409	1	No	Mesh	Site 3-Mesh	Site 3-M1	6	49.27	48.14	Foraminifera	Foraminifera msp. 1	4		0.63	1	0
2018	Site 3	409	1	No	Mesh	Site 3-Mesh	Site 3-M1	Internal	49.27	48.14	Unknown	Unknown msp. 3	1
2018	Site 3	409	1	No	Mesh	Site 3-Mesh	Site 3-M1	Internal	49.27	48.14	Radiozoa	Radiozoa msp. 1	1		0.76
2018	Site 3	409	1	No	Mesh	Site 3-Mesh	Site 3-M1	Internal	49.27	48.14	Foraminifera	Foraminifera msp. 1	8		0.708
2018	Site 3	409	1	No	Mesh	Site 3-Mesh	Site 3-M1	Internal	49.27	48.14	Foraminifera	Foraminifera msp. 4	1		0.62
2018	Site 3	409	1	No	Mesh	Site 3-Mesh	Site 3-M2	1	52.75	51.32	Annelida	Polychaeta msp. 2	1			1	0
2018	Site 3	409	1	No	Mesh	Site 3-Mesh	Site 3-M2	1	52.75	51.32	Cnidaria	Eudendrium msp. 1	3			5	5
2018	Site 3	409	1	No	Mesh	Site 3-Mesh	Site 3-M2	1	52.75	51.32	Foraminifera	Foraminifera msp. 1	10		0.676667	1	0
2018	Site 3	409	1	No	Mesh	Site 3-Mesh	Site 3-M2	2	60.34	49.87	Arthropoda	Gammaridea msp. 1	1			1	0
2018	Site 3	409	1	No	Mesh	Site 3-Mesh	Site 3-M2	2	60.34	49.87	Cnidaria	Campanulariidae msp. 2	1			1	1
2018	Site 3	409	1	No	Mesh	Site 3-Mesh	Site 3-M2	2	60.34	49.87	Cnidaria	Eudendrium msp. 1	7			5	5
2018	Site 3	409	1	No	Mesh	Site 3-Mesh	Site 3-M2	2	60.34	49.87	Foraminifera	Foraminifera msp. 1	7		0.546667	1	0
2018	Site 3	409	1	No	Mesh	Site 3-Mesh	Site 3-M2	3	55.42	51.87	Cnidaria	Eudendrium msp. 1	1			1	1
2018	Site 3	409	1	No	Mesh	Site 3-Mesh	Site 3-M2	3	55.42	51.87	Cnidaria	Campanulariidae msp. 3	10			1	1
2018	Site 3	409	1	No	Mesh	Site 3-Mesh	Site 3-M2	3	55.42	51.87	Foraminifera	Foraminifera msp. 1	4		0.5	1	0
2018	Site 3	409	1	No	Mesh	Site 3-Mesh	Site 3-M2	4	61.86	51.4	Arthropoda	Gammaridea msp. 1	1			1	0
2018	Site 3	409	1	No	Mesh	Site 3-Mesh	Site 3-M2	4	61.86	51.4	Cnidaria	Eudendrium msp. 1	2			1	1
2018	Site 3	409	1	No	Mesh	Site 3-Mesh	Site 3-M2	4	61.86	51.4	Foraminifera	Foraminifera msp. 1	5		0.566667	1	0
2018	Site 3	409	1	No	Mesh	Site 3-Mesh	Site 3-M2	5	50.49	46.4	Foraminifera	Foraminifera msp. 1	4		0.573333	1	0
2018	Site 3	409	1	No	Mesh	Site 3-Mesh	Site 3-M2	6	49.52	48	Cnidaria	Eudendrium msp. 1	5			1	1
2018	Site 3	409	1	No	Mesh	Site 3-Mesh	Site 3-M2	6	49.52	48	Foraminifera	Foraminifera msp. 1	3		0.653333	1	0
2018	Site 3	409	1	No	Mesh	Site 3-Mesh	Site 3-M3	1	50.55	52.23	Arthropoda	Gammaridea msp. 1	1			1	0
2018	Site 3	409	1	No	Mesh	Site 3-Mesh	Site 3-M3	1	50.55	52.23	Cnidaria	Eudendrium msp. 1	3			1	1
2018	Site 3	409	1	No	Mesh	Site 3-Mesh	Site 3-M3	1	50.55	52.23	Cnidaria	Campanulariidae msp. 3	5			1	1
2018	Site 3	409	1	No	Mesh	Site 3-Mesh	Site 3-M3	1	50.55	52.23	Foraminifera	Foraminifera msp. 1	3		0.67	1	0
2018	Site 3	409	1	No	Mesh	Site 3-Mesh	Site 3-M3	1	50.55	52.23
2018	Site 3	409	1	No	Mesh	Site 3-Mesh	Site 3-M3	2	46.05	52.69	Cnidaria	Eudendrium msp. 1	5			1	5
2018	Site 3	409	1	No	Mesh	Site 3-Mesh	Site 3-M3	2	46.05	52.69	Cnidaria	Campanulariidae msp. 3	30	3.18	0.63	5	5
2018	Site 3	409	1	No	Mesh	Site 3-Mesh	Site 3-M3	2	46.05	52.69	Foraminifera	Foraminifera msp. 1	1		0.84	1	0
2018	Site 3	409	1	No	Mesh	Site 3-Mesh	Site 3-M3	3	50.84	50.84	Arthropoda	Gammaridea msp. 1	1			1	0
2018	Site 3	409	1	No	Mesh	Site 3-Mesh	Site 3-M3	3	50.84	50.84	Foraminifera	Foraminifera msp. 1	8		0.536667	1	0
2018	Site 3	409	1	No	Mesh	Site 3-Mesh	Site 3-M3	4	51.74	51.85	Cnidaria	Campanulariidae msp. 2	1			1	1
2018	Site 3	409	1	No	Mesh	Site 3-Mesh	Site 3-M3	4	51.74	51.85	Cnidaria	Campanulariidae msp. 3	2			1	1
2018	Site 3	409	1	No	Mesh	Site 3-Mesh	Site 3-M3	4	51.74	51.85	Annelida	Polychaeta msp. 1	1			5	0
2018	Site 3	409	1	No	Mesh	Site 3-Mesh	Site 3-M3	4	51.74	51.85	Foraminifera	Foraminifera msp. 1	9		0.44	1	0
2018	Site 3	409	1	No	Mesh	Site 3-Mesh	Site 3-M3	5	47.7	52.03	Cnidaria	Campanulariidae msp. 2	2			1	1
2018	Site 3	409	1	No	Mesh	Site 3-Mesh	Site 3-M3	5	47.7	52.03	Cnidaria	Eudendrium msp. 1	3			1	1
2018	Site 3	409	1	No	Mesh	Site 3-Mesh	Site 3-M3	5	47.7	52.03	Foraminifera	Foraminifera msp. 1	3		0.6	1	0
2018	Site 3	409	1	No	Mesh	Site 3-Mesh	Site 3-M3	6	46.9	53.44	Cnidaria	Campanulariidae msp. 3	3			1	1
2018	Site 3	409	1	No	Mesh	Site 3-Mesh	Site 3-M3	6	46.9	53.44	Foraminifera	Foraminifera msp. 1	1		0.56	1	0
2018	Site 3	409	1	No	Mesh	Site 3-Mesh	Site 3-M3	Internal	46.9	53.44	Arthropoda	Copepoda msp. 1	2
2018	Site 3	409	1	No	Mesh	Site 3-Mesh	Site 3-M3	Internal	46.9	53.44	Radiozoa	Radiozoa msp. 1	1		0.86
2018	Site 3	409	1	No	Mesh	Site 3-Mesh	Site 3-M3	Internal	46.9	53.44	Cnidaria	Eudendrium msp. 1
2018	Site 3	409	1	No	Plastic	Site 3-Plastic	Site 3-P1	1	41.96	42.48	Cnidaria	Campanulariidae msp. 3	184.188	1.025	0.2025	5	1
2018	Site 3	409	1	No	Plastic	Site 3-Plastic	Site 3-P1	2	42.47	43.01	Cnidaria	Campanulariidae msp. 3	389.682	1.6975	0.28	10	5
2018	Site 3	409	1	No	Plastic	Site 3-Plastic	Site 3-P1	3	42.4	43.41	Cnidaria	Campanulariidae msp. 3	227.005	1.32	0.343333	5	1
2018	Site 3	409	1	No	Plastic	Site 3-Plastic	Site 3-P1	4	42.67	43.84	Cnidaria	Campanulariidae msp. 3	124.71	1.35333	0.22	5	1
2018	Site 3	409	1	No	Plastic	Site 3-Plastic	Site 3-P1	4	42.67	43.84	Arthropoda	Gammaridea msp. 1	1	1.29	0.86	1	0
2018	Site 3	409	1	No	Plastic	Site 3-Plastic	Site 3-P1	4	42.67	43.84	Foraminifera	Foraminifera msp. 4	1		0.3	1	0
2018	Site 3	409	1	No	Plastic	Site 3-Plastic	Site 3-P1	5	43.07	42.91	Cnidaria	Campanulariidae msp. 3	431.231	1.04333	0.236667	5	1
2018	Site 3	409	1	No	Plastic	Site 3-Plastic	Site 3-P1	6	42.66	43.05	Cnidaria	Campanulariidae msp. 3	281.599	0.96	0.313333	5	5
2018	Site 3	409	1	No	Plastic	Site 3-Plastic	Site 3-P2	1	43.44	44.03	Cnidaria	Campanulariidae msp. 3	363.406	3.32	0.366667	10	5
2018	Site 3	409	1	No	Plastic	Site 3-Plastic	Site 3-P2	1	43.44	44.03	Cnidaria	Eudendrium msp. 1	31.8777	13.43	0.366667	5	10
2018	Site 3	409	1	No	Plastic	Site 3-Plastic	Site 3-P2	2	43.15	43.58	Cnidaria	Campanulariidae msp. 3	62.6826	2.05667	0.426667	5	1
2018	Site 3	409	1	No	Plastic	Site 3-Plastic	Site 3-P2	3	43.59	43.8	Cnidaria	Campanulariidae msp. 3	362.756	1.42667	0.22	10	5
2018	Site 3	409	1	No	Plastic	Site 3-Plastic	Site 3-P2	3	43.59	43.8	Cnidaria	Eudendrium msp. 1	9	7.79667	0.37	1	5
2018	Site 3	409	1	No	Plastic	Site 3-Plastic	Site 3-P2	4	43.37	43.65	Cnidaria	Campanulariidae msp. 2 low	4	0.955	0.23	5	0
2018	Site 3	409	1	No	Plastic	Site 3-Plastic	Site 3-P2	4	43.37	43.65	Cnidaria	Campanulariidae msp. 3	94.655	2.595	0.195	5	1
2018	Site 3	409	1	No	Plastic	Site 3-Plastic	Site 3-P2	4	43.37	43.65	Arthropoda	Gammaridea msp. 1	1	5.22	1.17	1	0
2018	Site 3	409	1	No	Plastic	Site 3-Plastic	Site 3-P2	4	43.37	43.65	Cnidaria	Campanulariidae msp. 2	1	3.88	0.3	1	5
2018	Site 3	409	1	No	Plastic	Site 3-Plastic	Site 3-P2	4	43.37	43.65	Foraminifera	Foraminifera msp. 1	1	0.28	0.43	1	0
2018	Site 3	409	1	No	Plastic	Site 3-Plastic	Site 3-P2	5	43.14	43.36	Cnidaria	Campanulariidae msp. 3	99.7627	0.88	0.303333	5	1
2018	Site 3	409	1	No	Plastic	Site 3-Plastic	Site 3-P2	5	43.14	43.36	Arthropoda	Gammaridea msp. 1	2	4.755	0.9	1	0
2018	Site 3	409	1	No	Plastic	Site 3-Plastic	Site 3-P2	5	43.14	43.36	Cnidaria	Eudendrium msp. 1	118.468	12.6067	0.516667	1	5
2018	Site 3	409	1	No	Plastic	Site 3-Plastic	Site 3-P2	6	43.25	43.91	Cnidaria	Eudendrium msp. 1	158.259	6.33667	0.47	5	5
2018	Site 3	409	1	No	Plastic	Site 3-Plastic	Site 3-P2	6	43.25	43.91	Cnidaria	Campanulariidae msp. 3	145.598	0.556667	0.256667	5	1
2018	Site 3	409	1	No	Plastic	Site 3-Plastic	Site 3-P2	6	43.25	43.91	Arthropoda	Gammaridea msp. 1	1	2.94	0.61	1	0
2018	Site 3	409	1	No	Plastic	Site 3-Plastic	Site 3-P3	1	44.58	45.14	Cnidaria	Eudendrium msp. 1	194.526	9.74333	0.383333	5	10
2018	Site 3	409	1	No	Plastic	Site 3-Plastic	Site 3-P3	1	44.58	45.14	Cnidaria	Campanulariidae msp. 3	80.4936	0.573333	0.246667	5	0
2018	Site 3	409	1	No	Plastic	Site 3-Plastic	Site 3-P3	1	44.58	45.14	Arthropoda	Copepoda msp. 1	1	2.92	0.82	1	0
2018	Site 3	409	1	No	Plastic	Site 3-Plastic	Site 3-P3	1	44.58	45.14	Arthropoda	Gammaridea msp. 1	2	4.31	2.31	1	0
2018	Site 3	409	1	No	Plastic	Site 3-Plastic	Site 3-P3	2	44.38	44.86	Cnidaria	Eudendrium msp. 1	59.7266	11.8733	0.393333	5	5
2018	Site 3	409	1	No	Plastic	Site 3-Plastic	Site 3-P3	2	44.38	44.86	Cnidaria	Campanulariidae msp. 3	145.998	0.65	0.233333	5	0
2018	Site 3	409	1	No	Plastic	Site 3-Plastic	Site 3-P3	2	44.38	44.86	Arthropoda	Gammaridea msp. 1	1	4.18	1.25	1	0
2018	Site 3	409	1	No	Plastic	Site 3-Plastic	Site 3-P3	3	44.01	45.55	Cnidaria	Campanulariidae msp. 3	287.334	1.03667	0.253333	10	5
2018	Site 3	409	1	No	Plastic	Site 3-Plastic	Site 3-P3	3	44.01	45.55	Cnidaria	Eudendrium msp. 1	100.233	9.77667	0.6	5	5
2018	Site 3	409	1	No	Plastic	Site 3-Plastic	Site 3-P3	3	44.01	45.55	Arthropoda	Gammaridea msp. 1	1	4.88667	1.02	1	0
2018	Site 3	409	1	No	Plastic	Site 3-Plastic	Site 3-P3	4	44.09	45.49	Cnidaria	Campanulariidae msp. 3	187.194	0.623333	0.243333	5	1
2018	Site 3	409	1	No	Plastic	Site 3-Plastic	Site 3-P3	4	44.09	45.49	Arthropoda	Gammaridea msp. 1	1	2.84	0.7	1	0
2018	Site 3	409	1	No	Plastic	Site 3-Plastic	Site 3-P3	4	44.09	45.49	Cnidaria	Eudendrium msp. 1	26.7421	6.27667	0.443333	1	1
2018	Site 3	409	1	No	Plastic	Site 3-Plastic	Site 3-P3	5	43.79	44.25	Cnidaria	Campanulariidae msp. 3	290.656	0.79	0.173333	5	0
2018	Site 3	409	1	No	Plastic	Site 3-Plastic	Site 3-P3	5	43.79	44.25	Cnidaria	Eudendrium msp. 1	11	7.81333	0.623333	1	5
2018	Site 3	409	1	No	Plastic	Site 3-Plastic	Site 3-P3	6	43.72	44.26	Cnidaria	Campanulariidae msp. 3	283.807	0.68	0.273333	10	1
2018	Site 3	409	1	No	Plastic	Site 3-Plastic	Site 3-P3	6	43.72	44.26	Cnidaria	Campanulariidae msp. 2	2	8.425	0.445	1	5
2018	Site 3	409	1	No	Plastic	Site 3-Plastic	Site 3-P3	6	43.72	44.26	Cnidaria	Campanulariidae msp. 2 low	135.453	0.966667	0.363333	1	5
2018	Site 3	409	1	No	Plastic	Site 3-Plastic	Site 3-P3	6	43.72	44.26	Cnidaria	Eudendrium msp. 1	7	6.22	0.36	1	5
2018	Site 3	409	1	No	Stone	Site 3-Stone	Site 3-S1	1	45.8	51.37	Cnidaria	Eudendrium msp. 1	70.5824			5	1
2018	Site 3	409	1	No	Stone	Site 3-Stone	Site 3-S1	2	45.9	50.94	Cnidaria	Eudendrium msp. 1	15.5876			1	1
2018	Site 3	409	1	No	Stone	Site 3-Stone	Site 3-S1	3	46.18	51.84	Cnidaria	Eudendrium msp. 1	1			1	1
2018	Site 3	409	1	No	Stone	Site 3-Stone	Site 3-S1	4	46.09	50.69	Cnidaria	Campanulariidae msp. 3	295.932	2.44	0.32	20	10
2018	Site 3	409	1	No	Stone	Site 3-Stone	Site 3-S1	5	49	50.22	Cnidaria	Campanulariidae msp. 2	6	7.825	0.403333	5	5
2018	Site 3	409	1	No	Stone	Site 3-Stone	Site 3-S1	5	49	50.22	Arthropoda	Gammaridea msp. 1	1	3.61	0.69	1	1
2018	Site 3	409	1	No	Stone	Site 3-Stone	Site 3-S1	6	49.22	50.16	Cnidaria	Campanulariidae msp. 3	567.841	0.386667	2.59	10	5
2018	Site 3	409	1	No	Stone	Site 3-Stone	Site 3-S1	6	49.22	50.16	Cnidaria	Eudendrium msp. 1	131.673			5	10
2018	Site 3	409	1	No	Stone	Site 3-Stone	Site 3-S1	6	49.22	50.16	Arthropoda	Gammaridea msp. 1	4	6.665	1.51	1	1
2018	Site 3	409	1	No	Stone	Site 3-Stone	Site 3-S2	1	46.37	53.02	Arthropoda	Gammaridea msp. 1	2	5.83	2.285	1	0
2018	Site 3	409	1	No	Stone	Site 3-Stone	Site 3-S2	1	46.37	53.02	Cnidaria	Eudendrium msp. 1	106.537			20	25
2018	Site 3	409	1	No	Stone	Site 3-Stone	Site 3-S2	2	46.16	51.25	Cnidaria	Eudendrium msp. 1	70.971			10	15
2018	Site 3	409	1	No	Stone	Site 3-Stone	Site 3-S2	2	46.16	51.25	Cnidaria	Campanulariidae msp. 3	13			5	5
2018	Site 3	409	1	No	Stone	Site 3-Stone	Site 3-S2	3	46.16	52.32
2018	Site 3	409	1	No	Stone	Site 3-Stone	Site 3-S2	4	46.46	51.69	Cnidaria	Eudendrium msp. 1	32.0202			15	20
2018	Site 3	409	1	No	Stone	Site 3-Stone	Site 3-S2	4	46.46	51.69	Foraminifera	Foraminifera msp. 1	1		0.56	1	0
2018	Site 3	409	1	No	Stone	Site 3-Stone	Site 3-S2	5	49.57	50.58	Cnidaria	Eudendrium msp. 1	58.5025			15	20
2018	Site 3	409	1	No	Stone	Site 3-Stone	Site 3-S2	5	49.57	50.58	Cnidaria	Campanulariidae msp. 3	15			5	5
2018	Site 3	409	1	No	Stone	Site 3-Stone	Site 3-S2	6	49.73	50.73	Arthropoda	Gammaridea msp. 1	1	2.2	1.09	1
2018	Site 3	409	1	No	Stone	Site 3-Stone	Site 3-S2	6	49.73	50.73	Cnidaria	Eudendrium msp. 1	33.6374			10	15
2018	Site 3	409	1	No	Stone	Site 3-Stone	Site 3-S2	6	49.73	50.73	Cnidaria	Campanulariidae msp. 3	10			5	5
2018	Site 3	409	1	No	Stone	Site 3-Stone	Site 3-S3	1	45.01	50.34	Arthropoda	Gammaridea msp. 1	1			1
2018	Site 3	409	1	No	Stone	Site 3-Stone	Site 3-S3	1	45.01	50.34	Cnidaria	Eudendrium msp. 1	52.8687			25	30
2018	Site 3	409	1	No	Stone	Site 3-Stone	Site 3-S3	1	45.01	50.34	Cnidaria	Campanulariidae msp. 3	422.95	2.60667	0.37	40	35
2018	Site 3	409	1	No	Stone	Site 3-Stone	Site 3-S3	2	44.58	50.76	Cnidaria	Eudendrium msp. 1	45.2576			5	5
2018	Site 3	409	1	No	Stone	Site 3-Stone	Site 3-S3	2	44.58	50.76	Cnidaria	Campanulariidae msp. 3	188.573	2.01333	0.373333	20	15
2018	Site 3	409	1	No	Stone	Site 3-Stone	Site 3-S3	3	44.43	50.23	Cnidaria	Campanulariidae msp. 3	617.442	1.74667	0.413333	10	5
2018	Site 3	409	1	No	Stone	Site 3-Stone	Site 3-S3	4	44.38	51.11	Cnidaria	Eudendrium msp. 1	211.704	1.56	0.396667	5	5
2018	Site 3	409	1	No	Stone	Site 3-Stone	Site 3-S3	5	50.21	49.74	Cnidaria	Eudendrium msp. 1	49.9489			10	15
2018	Site 3	409	1	No	Stone	Site 3-Stone	Site 3-S3	5	50.21	49.74	Cnidaria	Campanulariidae msp. 3	249.745	1.78	0.286667	20	15
2018	Site 3	409	1	No	Stone	Site 3-Stone	Site 3-S3	6	50.42	49.7	Arthropoda	Gammaridea msp. 1	4	5.18667	1.12333	1	0
2018	Site 3	409	1	No	Stone	Site 3-Stone	Site 3-S3	6	50.42	49.7	Cnidaria	Eudendrium msp. 1	23			10	15
2018	Site 3	409	1	No	Stone	Site 3-Stone	Site 3-S3	6	50.42	49.7	Cnidaria	Campanulariidae msp. 3	442.704	2.24	0.393333	40	35

## Sheet: Abundance
Phylum/	Site 1				Site 1	Site 2				Site 2	Site 3				Site 3	Site 4				Site 4	Mesh	Plastic	Stone	Wood	All blocks
Species	Mesh	Plastic	Stone	Wood	Total	Mesh	Plastic	Stone	Wood	Total	Mesh	Plastic	Stone	Wood	Total	Mesh	Plastic	Stone	Wood	Total	Total	Total	Total	Total	pooled
Annelida	0	0	0	0	0	0	0	0	0	0	2	0	0	0	2	0	0	1	0	1	2	0	1	0	3
Polychaeta sp. 1	0	0	0	0	0	0	0	0	0	0	1	0	0	0	1	0	0	1	0	1	1	0	1	0	2
Polychaeta sp. 2	0	0	0	0	0	0	0	0	0	0	1	0	0	0	1	0	0	0	0	0	1	0	0	0	1
Arthropoda	22	0	0	0	22	20	1	0	0	21	7	11	13	0	31	49	3	0	1	53	98	15	13	1	127
Caprellidae sp. 1	1	0	0	0	1	0	0	0	0	0	0	0	0	0	0	19	1	0	0	20	20	1	0	0	21
Copepoda sp. 1	16	0	0	0	16	20	1	0	0	21	2	1	0	0	3	20	2	0	1	23	58	4	0	1	63
Gammaridea sp. 1	0	0	0	0	0	0	0	0	0	0	5	10	13	0	28	0	0	0	0	0	5	10	13	0	28
Gammaridea sp. 2	4	0	0	0	4	0	0	0	0	0	0	0	0	0	0	0	0	0	0	0	4	0	0	0	4
Halacaridae sp. 1	1	0	0	0	1	0	0	0	0	0	0	0	0	0	0	0	0	0	0	0	1	0	0	0	1
Isopoda sp. 1	0	0	0	0	0	0	0	0	0	0	0	0	0	0	0	9	0	0	0	9	9	0	0	0	9
Ostracoda sp. 1	0	0	0	0	0	0	0	0	0	0	0	0	0	0	0	1	0	0	0	1	1	0	0	0	1
Cnidaria	24497.3	11296.4	20462.1	585	56840.8	154	12131.8	16	40	12341.8	93	4902.04	3732.48	0	8727.52	16130.4	13414.3	17211.9	2524	49280.6	40874.7	41744.6	41422.5	3149	127191
Actinaria sp. 1	1	0	0	0	1	0	0	0	0	0	0	0	0	0	0	2	1	0	0	3	3	1	0	0	4
Campanulariidae sp. 1	0	0	0	0	0	0	0	13	0	13	0	0	0	0	0	0	0	0	0	0	0	0	13	0	13
Campanulariidae sp. 2A	64	67	29	0	160	0	0	0	0	0	7	3	6	0	16	97	116	78	73	364	168	186	113	73	540
Campanulariidae sp. 2B	0	624.594	326.816	0	951.411	0	0	0	0	0	0	139.453	0	0	139.453	0	1075.68	896.734	850	2822.41	0	1839.72	1223.55	850	3913.27
Campanulariidae sp. 3	23695.8	10489.2	19793	585	54563	154	12131.8	3	40	12328.8	56	4042.76	2823.19	0	6921.95	9814.82	10682.8	15525.5	1510	37533.1	33720.6	37346.6	38144.6	2135	111347
Campanulariidae sp. 4	1	0	0	0	1	0	0	0	0	0	0	0	0	0	0	15	0	0	0	15	16	0	0	0	16
Eudendrium sp. 1	734.458	113.539	312.304	0	1160.3	0	0	0	0	0	30	716.833	903.291	0	1650.12	1802.16	1537.83	706.699	91	4137.68	2566.61	2368.2	1922.29	91	6948.1
Eudendrium sp. 2	0	0	0	0	0	0	0	0	0	0	0	0	0	0	0	4396.4	0	0	0	4396.4	4396.4	0	0	0	4396.4
Hydrozoa sp. 1	0	0	0	0	0	0	0	0	0	0	0	0	0	0	0	0	0	2	0	2	0	0	2	0	2
Octocorallia sp. 1	1	2	1	0	4	0	0	0	0	0	0	0	0	0	0	3	1	3	0	7	4	3	4	0	11
Foraminifera	134	0	2	1	137	6	0	0	0	6	88	2	1	0	91	10	0	5	0	15	238	2	8	1	249
Foraminifera sp. 1	134	0	2	1	137	5	0	0	0	5	87	1	1	0	89	7	0	4	0	11	233	1	7	1	242
Foraminifera sp. 2	0	0	0	0	0	0	0	0	0	0	0	0	0	0	0	1	0	1	0	2	1	0	1	0	2
Foraminifera sp. 3	0	0	0	0	0	1	0	0	0	1	0	0	0	0	0	2	0	0	0	2	3	0	0	0	3
Foraminifera sp. 4	0	0	0	0	0	0	0	0	0	0	1	1	0	0	2	0	0	0	0	0	1	1	0	0	2
Mollusca	0	0	0	0	0	0	0	0	0	0	0	0	0	0	0	35	0	0	0	35	35	0	0	0	35
Gastropoda sp. 1	0	0	0	0	0	0	0	0	0	0	0	0	0	0	0	1	0	0	0	1	1	0	0	0	1
Gastropoda sp. 2	0	0	0	0	0	0	0	0	0	0	0	0	0	0	0	34	0	0	0	34	34	0	0	0	34
Porifera	2	0	0	0	2	1	0	0	0	1	1	0	0	0	1	0	0	0	0	0	4	0	0	0	4
Porifera sp. 1	0	0	0	0	0	0	0	0	0	0	1	0	0	0	1	0	0	0	0	0	1	0	0	0	1
Porifera sp. 2	1	0	0	0	1	1	0	0	0	1	0	0	0	0	0	0	0	0	0	0	2	0	0	0	2
Porifera sp. 3	1	0	0	0	1	0	0	0	0	0	0	0	0	0	0	0	0	0	0	0	1	0	0	0	1
Radiolaria	0	0	0	0	0	1	0	1	0	2	2	0	0	0	2	2	1	1	0	4	5	1	2	0	8
Radiolaria sp. 1	0	0	0	0	0	1	0	1	0	2	2	0	0	0	2	2	1	1	0	4	5	1	2	0	8
Unknown	0	0	99	0	99	0	0	2	1	3	1	0	0	0	1	2	0	2	0	4	3	0	103	1	107
Unknown sp. 1	0	0	99	0	99	0	0	2	0	2	0	0	0	0	0	0	0	2	0	2	0	0	103	0	103
Unknown sp. 2	0	0	0	0	0	0	0	0	0	0	0	0	0	0	0	2	0	0	0	2	2	0	0	0	2
Unknown sp. 3	0	0	0	0	0	0	0	0	1	1	1	0	0	0	1	0	0	0	0	0	1	0	0	1	2
Species pooled	24655.3	11296.4	20563.1	586	57100.8	182	12132.8	19	41	12374.8	194	4915.04	3746.48	0	8855.52	16228.4	13418.3	17220.9	2525	49392.6	41259.7	41762.6	41549.5	3152	127724

## Sheet: Density
Phylum/	Site 1				Site 1	Site 2				Site 2	Site 3				Site 3	Site 4				Site 4	Mesh	Plastic	Stone	Wood	All blocks
Species	Mesh	Plastic	Stone	Wood	Total	Mesh	Plastic	Stone	Wood	Total	Mesh	Plastic	Stone	Wood	Total	Mesh	Plastic	Stone	Wood	Total	Total	Total	Total	Total	pooled
Annelida	0	0	0	0	0	0	0	0	0	0	0.00247192	0	0	0	0.00061798	0	0	0.00145872	0	0.000364681	0.00061798	0	0.000364681	0	0.000245665	0.000696306
Polychaeta sp. 1	0	0	0	0	0	0	0	0	0	0	0.00259265	0	0	0	0.000648163	0	0	0.00291745	0	0.000729362	0.000648163	0	0.000729362	0	0.000344381	0.000942895
Polychaeta sp. 2	0	0	0	0	0	0	0	0	0	0	0.00235119	0	0	0	0.000587797	0	0	0	0	0	0.000587797	0	0	0	0.000146949	0.000587797
Arthropoda	0.00469293	0	0	0	0.00117323	0.00375113	0.000504396	0	0	0.00106388	0.00182932	0.00226817	0.0025746	0	0.00166802	0.0093376	0.00146108	0	0.00246136	0.00331501	0.00490275	0.00105841	0.00064365	0.000615339	0.00180504	0.00251292
Caprellidae sp. 1	0.00258935	0	0	0	0.000647339	0	0	0	0	0	0	0	0	0	0	0.0232578	0.00334118	0	0	0.00664974	0.00646178	0.000835296	0	0	0.00182427	0.00580543
Copepoda sp. 1	0.0209776	0	0	0	0.0052444	0.0262579	0.00353077	0	0	0.00744718	0.0051853	0.00336281	0	0	0.00213703	0.0177012	0.0068864	0	0.0172295	0.0104543	0.0175305	0.00344499	0	0.00430737	0.00632072	0.00893901
Gammaridea sp. 1	0	0	0	0	0	0	0	0	0	0	0.00761996	0.0125144	0.0180222	0	0.00953913	0	0	0	0	0	0.00190499	0.0031286	0.00450555	0	0.00238478	0.00546795
Gammaridea sp. 2	0.00669417	0	0	0	0.00167354	0	0	0	0	0	0	0	0	0	0	0	0	0	0	0	0.00167354	0	0	0	0.000418386	0.00167354
Halacaridae sp. 1	0.00258935	0	0	0	0.000647339	0	0	0	0	0	0	0	0	0	0	0	0	0	0	0	0.000647339	0	0	0	0.000161835	0.000647339
Isopoda sp. 1	0	0	0	0	0	0	0	0	0	0	0	0	0	0	0	0.0220337	0	0	0	0.00550842	0.00550842	0	0	0	0.0013771	0.00550842
Ostracoda sp. 1	0	0	0	0	0	0	0	0	0	0	0	0	0	0	0	0.00237055	0	0	0	0.000592636	0.000592636	0	0	0	0.000148159	0.000592636
Cnidaria	1.25747	1.70154	1.09451	0.245626	1.07478	0.0239797	0.85651	0.00110915	0.0587372	0.235084	0.00950582	0.3348	0.285714	0	0.157505	0.717661	1.12379	1.09124	2.05548	1.24704	0.502153	1.00416	0.618143	0.589961	0.678604	0.657869
Actinaria sp. 1	0.00258935	0	0	0	0.000647339	0	0	0	0	0	0	0	0	0	0	0.00451316	0.00338016	0	0	0.00197333	0.00177563	0.000845039	0	0	0.000655167	0.00145215
Campanulariidae sp. 1	0	0	0	0	0	0	0	0.00835739	0	0.00208935	0	0	0	0	0	0	0	0	0	0	0	0	0.00208935	0	0.000522337	0.00208935
Campanulariidae sp. 2A	0.0592775	0.150447	0.0225947	0	0.0580798	0	0	0	0	0	0.00891628	0.0102461	0.0165468	0	0.00892731	0.0504799	0.0657791	0.0566963	0.314438	0.121848	0.0296684	0.0566181	0.0239595	0.0786096	0.0472139	0.0818175
Campanulariidae sp. 2B	0	3.78651	0.759296	0	1.13645	0	0	0	0	0	0	0.469585	0	0	0.117396	0	3.63595	2.63565	14.6451	5.22917	0	1.97301	0.848737	3.66127	1.62075	3.72156
Campanulariidae sp. 3	12.0028	12.7267	9.9191	2.45626	9.27619	0.239797	8.5651	0.00273411	0.587372	2.34875	0.0654951	2.36488	2.30986	0	1.18506	4.26825	6.65449	7.7812	5.20331	5.97681	4.14408	7.57778	5.00322	2.06174	4.6967	4.41459
Campanulariidae sp. 4	0.00242636	0	0	0	0.00060659	0	0	0	0	0	0	0	0	0	0	0.0112829	0	0	0	0.00282072	0.00342731	0	0	0	0.000856828	0.0028454
Eudendrium sp. 1	0.505194	0.339527	0.241741	0	0.271615	0	0	0	0	0	0.0206468	0.503288	0.530738	0	0.263668	1.10265	0.874899	0.427002	0.391971	0.699132	0.407124	0.429429	0.29987	0.0979928	0.308604	0.342328
Eudendrium sp. 2	0	0	0	0	0	0	0	0	0	0	0	0	0	0	0	1.73698	0	0	0	0.434245	0.434245	0	0	0	0.108561	0.434245
Hydrozoa sp. 1	0	0	0	0	0	0	0	0	0	0	0	0	0	0	0	0	0	0.00583489	0	0.00145872	0	0	0.00145872	0	0.000364681	0.00145872
Octocorallia sp. 1	0.00242636	0.012264	0.00232331	0	0.00425342	0	0	0	0	0	0	0	0	0	0	0.00244819	0.00338016	0.00602776	0	0.00296403	0.00121864	0.00391104	0.00208777	0	0.00180436	0.00330002
Foraminifera	0.0158124	0	0.00115656	0.00524843	0.00555434	0.00347532	0	0	0	0.000868829	0.00983623	0.00178434	0.000678826	0	0.00307485	0.00325104	0	0.00225778	0	0.0013772	0.00809374	0.000446086	0.00102329	0.00131211	0.00271881	0.00438775
Foraminifera sp. 1	0.0632494	0	0.00462625	0.0209937	0.0222173	0.0115844	0	0	0	0.0028961	0.0366688	0.00352053	0.0027153	0	0.0107262	0.00604282	0	0.0059208	0	0.00299091	0.0293864	0.000880132	0.00331559	0.00524843	0.00970763	0.0173685
Foraminifera sp. 2	0	0	0	0	0	0	0	0	0	0	0	0	0	0	0	0.00225658	0	0.00311031	0	0.00134172	0.000564144	0	0.000777579	0	0.000335431	0.00092973
Foraminifera sp. 3	0	0	0	0	0	0.00231688	0	0	0	0.000579219	0	0	0	0	0	0.00470476	0	0	0	0.00117619	0.00175541	0	0	0	0.000438853	0.00127596
Foraminifera sp. 4	0	0	0	0	0	0	0	0	0	0	0.00267612	0.00361684	0	0	0.00157324	0	0	0	0	0	0.00066903	0.00090421	0	0	0.00039331	0.00108837
Mollusca	0	0	0	0	0	0	0	0	0	0	0	0	0	0	0	0.0414276	0	0	0	0.0103569	0.0103569	0	0	0	0.00258922	0.0103569
Gastropoda sp. 1	0	0	0	0	0	0	0	0	0	0	0	0	0	0	0	0.00225658	0	0	0	0.000564144	0.000564144	0	0	0	0.000141036	0.000564144
Gastropoda sp. 2	0	0	0	0	0	0	0	0	0	0	0	0	0	0	0	0.0805985	0	0	0	0.0201496	0.0201496	0	0	0	0.00503741	0.0201496
Porifera	0.00182436	0	0	0	0.000456091	0.000772292	0	0	0	0.000193073	0.00089204	0	0	0	0.00022301	0	0	0	0	0	0.000872174	0	0	0	0.000218043	0.000513795
Porifera sp. 1	0	0	0	0	0	0	0	0	0	0	0.00267612	0	0	0	0.00066903	0	0	0	0	0	0.00066903	0	0	0	0.000167257	0.00066903
Porifera sp. 2	0.00273654	0	0	0	0.000684136	0.00231688	0	0	0	0.000579219	0	0	0	0	0	0	0	0	0	0	0.00126336	0	0	0	0.000315839	0.000866431
Porifera sp. 3	0.00273654	0	0	0	0.000684136	0	0	0	0	0	0	0	0	0	0	0	0	0	0	0	0.000684136	0	0	0	0.000171034	0.000684136
Radiolaria	0	0	0	0	0	0.00231688	0	0.00280373	0	0.00128015	0.00526877	0	0	0	0.00131719	0.00451316	0.00338016	0.00311031	0	0.00275091	0.0030247	0.000845039	0.00147851	0	0.00133706	0.00189478
Radiozoa sp. 1	0	0	0	0	0	0.00231688	0	0.00280373	0	0.00128015	0.00526877	0	0	0	0.00131719	0.00451316	0.00338016	0.00311031	0	0.00275091	0.0030247	0.000845039	0.00147851	0	0.00133706	0.00189478
Unknown	0	0	0.0389444	0	0.0097361	0	0	0.00186915	0.00489476	0.00169098	0.00089204	0	0	0	0.00022301	0.00150439	0	0.000972482	0	0.000619217	0.000599106	0	0.0104465	0.00122369	0.00306733	0.00965259
Unknown sp. 1	0	0	0.116833	0	0.0292083	0	0	0.00560746	0	0.00140187	0	0	0	0	0	0	0	0.00291745	0	0.000729362	0	0	0.0313395	0	0.00783488	0.0291064
Unknown sp. 2	0	0	0	0	0	0	0	0	0	0	0	0	0	0	0	0.00451316	0	0	0	0.00112829	0.00112829	0	0	0	0.000282072	0.00112829
Unknown sp. 3	0	0	0	0	0	0	0	0	0.0146843	0.00367107	0.00267612	0	0	0	0.00066903	0	0	0	0	0	0.00066903	0	0	0.00367107	0.00108503	0.0036874
Species pooled	65.5377	85.9198	55.1222	1.9028	52.1206	1.42423	42.8486	0.097749	0.505751	11.2191	0.81089	16.7915	14.2945	0	10.6323	36.3966	56.5126	54.9234	12.0201	39.9632	26.0423	50.5182	31.7337	4.80956	28.4838	28.684

## Sheet: Statistical analyses
	PERMANOVA		ANOSIM				PERMANOVA		ANOSIM				PERMANOVA
Substratum Type	Pseudo-F	Significance (p)	Dissimilarity (ρ)	Significance (p)		Geographic site	Pseudo-F	Significance (p)	Dissimilarity (ρ)	Significance (p)		Site x Substratum type	Pseudo-F	Significance (p)
Base coverage	5.28	<0.001	0.441	<0.001		Base coverage	10.05	<0.001	0.67	<0.001		Base coverage	3.01	<0.001
Mesh, Plastic			0.583	<0.001		Site 1, Site 2			0.951	0.001		Canopy coverage	3.01	<0.001
Mesh, Stone			0.556	0.004		Site 1, Site 3			0.58	0.006		Abundance	3.46	<0.001
Mesh, Wood			0.704	0.047		Site 1, Site 4			0.025	0.405		Density	3.64	<0.001
Plastic, Stone			0.213	0.067		Site 2, Site 3			0.901	0.001		Shannon diversity	2.35	0.002
Plastic, Wood			0.852	0.016		Site 2, Site 4			0.84	0.001		Species richness	0.89	0.549
Stone, Wood			0.259	0.172		Site 3, Site 4			0.63	0.002		Phylum richness	0.55	0.82
Canopy coverage	3.39	<0.001	0.352	<0.001		Canopy coverage	10.11	<0.001	0.592	<0.001
Mesh, Plastic			0.37	0.005		Site 1, Site 2			0.938	0.001
Mesh, Stone			0.463	0.002		Site 1, Site 3			0.383	0.032
Mesh, Wood			0.111	0.422		Site 1, Site 4			0.012	0.456
Plastic, Stone			0.389	0.006		Site 2, Site 3			0.704	0.003
Plastic, Wood			0.704	0.016		Site 2, Site 4			0.963	0.001
Stone, Wood			0.333	0.125		Site 3, Site 4			0.494	0.003
Abundance	8.15	<0.001	0.471	<0.001		Abundance	10.99	<0.001	0.617	<0.001
Mesh, Plastic			0.657	<0.001		Site 1, Site 2			0.889	0.001
Mesh, Stone			0.593	0.001		Site 1, Site 3			0.753	0.002
Mesh, Wood			0.63	0.063		Site 1, Site 4			-0.062	0.599
Plastic, Stone			0.185	0.125		Site 2, Site 3			0.926	0.001
Plastic, Wood			0.704	0.047		Site 2, Site 4			0.827	0.001
Stone, Wood			0.556	0.109		Site 3, Site 4			0.457	0.002
Density	6.74	<0.001	0.405	<0.001		Density	9.31	<0.001	0.553	<0.001
Mesh, Plastic			0.5	0.006		Site 1, Site 2			0.877	0.001
Mesh, Stone			0.463	0.006		Site 1, Site 3			0.778	0.001
Mesh, Wood			0.556	0.078		Site 1, Site 4			-0.025	0.49
Plastic, Stone			0.157	0.163		Site 2, Site 3			0.901	0.001
Plastic, Wood			0.704	0.047		Site 2, Site 4			0.605	0.002
Stone, Wood			0.407	0.188		Site 3, Site 4			0.259	0.034
Shannon diversity	1.07	0.374	0.212	0.025		Shannon diversity	3.82	<0.001	0.292	<0.001
Mesh, Plastic			0.339	0.019		Site 1, Site 2			0.267	0.033
Mesh, Stone			0.139	0.172		Site 1, Site 3			0.346	0.01
Mesh, Wood			0.556	0.078		Site 1, Site 4			0.074	0.324
Plastic, Stone			0.021	0.374		Site 2, Site 3			0.558	0.001
Plastic, Wood			0.407	0.094		Site 2, Site 4			0.304	0.04
Stone, Wood			0.185	0.266		Site 3, Site 4			0.259	0.077
Species richness	8.62	<0.001	0.326	0.005		Species richness	9.87	<0.001	0.328	0.002
Mesh, Plastic			0.569	0.001		Site 1, Site 2			0.543	0.01
Mesh, Stone			0.514	<0.001		Site 1, Site 3			0.006	0.436
Mesh, Wood			1	0.016		Site 1, Site 4			0.08	0.814
Plastic, Stone			-0.046	0.58		Site 2, Site 3			0.58	0.004
Plastic, Wood			0.037	0.484		Site 2, Site 4			0.765	0.001
Stone, Wood			-0.296	1		Site 3, Site 4			0.012	0.507
Phylum richness	9.19	<0.001	0.247	0.019		Phylum richness	2.51	0.07	0.066	0.237
Mesh, Plastic			0.625	<0.001		Site 1, Site 2			-0.167	1
Mesh, Stone			0.366	0.01		Site 1, Site 3			0.296	0.056
Mesh, Wood			0.852	0.031		Site 1, Site 4			0.056	0.472
Plastic, Stone			-0.13	0.761		Site 2, Site 3			0.222	0.13
Plastic, Wood			-0.222	1		Site 2, Site 4			0.111	0.262
Stone, Wood			-0.333	0.969		Site 3, Site 4			-0.117	0.73

## Sheet: Surface cover
	Site 1				Site 2				Site 3			Site 4
Species	Mesh	Plastic	Stone	Wood	Mesh	Plastic	Stone	Wood	Mesh	Plastic	Stone	Mesh	Plastic	Stone	Wood
Polychaeta sp. 1	0	0	0	0	0	0	0	0	5	0	0	0	0	1	0
Polychaeta sp. 2	0	0	0	0	0	0	0	0	1	0	0	0	0	0	0
Caprellidae sp. 1	0	0	0	0	0	0	0	0	0	0	0	2.5	0	0	0
Copepoda sp. 1	1	0	0	0	2	1	0	0	0	1	0	3.4	1	0	1
Gammaridea sp. 1	0	0	0	0	0	0	0	0	1	1	1	0	0	0	0
Gammaridea sp. 2	3.66667	0	0	0	0	0	0	0	0	0	0	0	0	0	0
Halacaridae sp. 1	1	0	0	0	0	0	0	0	0	0	0	0	0	0	0
Isopoda sp. 1	0	0	0	0	0	0	0	0	0	0	0	5	0	0	0
Ostracoda sp. 1	0	0	0	0	0	0	0	0	0	0	0	1	0	0	0
Actinaria sp. 1	0	0	0	0	0	0	0	0	0	0	0	1	1	0	0
Campanulariidae sp. 1	0	0	0	0	0	0	4.92308	0	0	0	0	0	0	0	0
Campanulariidae sp. 2	3.8	8	3	0	0	0	0	0	1	1	5	4	5.16667	6.1	16.5
Campanulariidae sp. 2B	0	7.5	5	0	0	0	0	0	0	3	0	0	5	5	50
Campanulariidae sp. 3	11.3333	28.3333	18.2857	62	8.75	12.6667	10	5	1.66667	6.38889	17.5	7.91667	23.5294	17.7778	52
Campanulariidae sp. 4	1	0	0	0	0	0	0	0	0	0	0	1	0	0	0
Eudendrium sp. 1	5.77778	3	8.33333	0	0	0	0	0	1.88889	3	9.78571	5.45455	11.1667	7.5	12.75
Eudendrium sp. 2	0	0	0	0	0	0	0	0	0	0	0	61.6667	0	0	0
Hydrozoa sp. 1	0	0	0	0	0	0	0	0	0	0	0	0	0	1	0
Octocorallia sp. 1	1	1	1	0	0	0	0	0	0	0	0	1	1	1	0
Foraminifera sp. 1	4.33333	0	1	1	1	0	0	0	1	1	1	0.666667	0	0.75	0
Foraminifera sp. 2	0	0	0	0	0	0	0	0	0	0	0	1	0	1	0
Foraminifera sp. 3	0	0	0	0	1	0	0	0	0	0	0	1	0	0	0
Foraminifera sp. 4	0	0	0	0	0	0	0	0	0	1	0	0	0	0	0
Gastropoda sp. 1	0	0	0	0	0	0	0	0	0	0	0	1	0	0	0
Gastropoda sp. 2	0	0	0	0	0	0	0	0	0	0	0	0	0	0	0
Porifera sp. 1	0	0	0	0	0	0	0	0	5	0	0	0	0	0	0
Porifera sp. 2	1	0	0	0	1	0	0	0	0	0	0	0	0	0	0
Porifera sp. 3	0	0	0	0	0	0	0	0	0	0	0	0	0	0	0
Radiolaria sp. 1	0	0	0	0	1	0	1	0	0	0	0	0	1	1	0
Unknown sp. 1	0	0	3.66667	0	0	0	1	0	0	0	0	0	0	0.5	0
Unknown sp. 2	0	0	0	0	0	0	0	0	0	0	0	0	0	0	0
Unknown sp. 3	0	0	0	0	0	0	0	1	0	0	0	0	0	0	0

## Sheet: Canopy cover
	Site 1				Site 2				Site 3			Site 4
Species	Mesh	Plastic	Stone	Wood	Mesh	Plastic	Stone	Wood	Mesh	Plastic	Stone	Mesh	Plastic	Stone	Wood
Polychaeta sp. 1	0	0	0	0	0	0	0	0	0	0	0	0	0	0	0
Polychaeta sp. 2	0	0	0	0	0	0	0	0	0	0	0	0	0	0	0
Caprellidae sp. 1	5	0	0	0	0	0	0	0	0	0	0	5	5	0	0
Copepoda sp. 1	0	0	0	0	0	0	0	0	0	0	0	0	0	0	0
Gammaridea sp. 1	0	0	0	0	0	0	0	0	0	0	0.5	0	0	0	0
Gammaridea sp. 2	0	0	0	0	0	0	0	0	0	0	0	0	0	0	0
Halacaridae sp. 1	0	0	0	0	0	0	0	0	0	0	0	0	0	0	0
Isopoda sp. 1	0	0	0	0	0	0	0	0	0	0	0	0	0	0	0
Ostracoda sp. 1	0	0	0	0	0	0	0	0	0	0	0	0	0	0	0
Actinaria sp. 1	0	0	0	0	0	0	0	0	0	0	0	1	0	0	0
Campanulariidae sp. 1	0	0	0	0	0	0	2.46154	0	0	0	0	0	0	0	0
Campanulariidae sp. 2	7.1	18.5714	3	0	0	0	0	0	1	5	5	16.4545	11.3889	12.5	32.5
Campanulariidae sp. 2B	0	12.5	5	0	0	0	0	0	0	2.5	0	0	10	7.5	0
Campanulariidae sp. 3	9.33333	13.1333	15.4167	53	6.25	1.6	6.66667	5	1.66667	1.94444	13.5	6.25	8.23529	11.9444	40
Campanulariidae sp. 4	1	0	0	0	0	0	0	0	0	0	0	5	0	0	0
Eudendrium sp. 1	6.88889	17.5	5.16667	0	0	0	0	0	2.33333	5.6	12.7143	7	31.1111	7.16667	10.25
Eudendrium sp. 2	0	0	0	0	0	0	0	0	0	0	0	72.5	0	0	0
Hydrozoa sp. 1	0	0	0	0	0	0	0	0	0	0	0	0	0	1	0
Octocorallia sp. 1	0	0	0	0	0	0	0	0	0	0	0	0	0	0	0
Foraminifera sp. 1	0.166667	0	0	0	0	0	0	0	0	0	0	0.333333	0	0.25	0
Foraminifera sp. 2	0	0	0	0	0	0	0	0	0	0	0	0	0	0	0
Foraminifera sp. 3	0	0	0	0	0	0	0	0	0	0	0	0	0	0	0
Foraminifera sp. 4	0	0	0	0	0	0	0	0	0	0	0	0	0	0	0
Gastropoda sp. 1	0	0	0	0	0	0	0	0	0	0	0	0	0	0	0
Gastropoda sp. 2	0	0	0	0	0	0	0	0	0	0	0	5	0	0	0
Porifera sp. 1	0	0	0	0	0	0	0	0	0	0	0	0	0	0	0
Porifera sp. 2	0	0	0	0	0	0	0	0	0	0	0	0	0	0	0
Porifera sp. 3	0	0	0	0	0	0	0	0	0	0	0	0	0	0	0
Radiolaria sp. 1	0	0	0	0	0	0	0	0	0	0	0	0	0	0	0
Unknown sp. 1	0	0	0	0	0	0	0	0	0	0	0	0	0	0.5	0
Unknown sp. 2	0	0	0	0	0	0	0	0	0	0	0	0	0	0	0
Unknown sp. 3	0	0	0	0	0	0	0	0	0	0	0	0	0	0	0
