# Supplementary material for: Between a rock and a hard place: experimental assessment of recruitment patterns in a bathyal environment of the Low Arctic
Source: PeerJ journal article supplement (doi:10.7717/peerj.19850), 2025-08-22
Supplement: Supplementary_1.pdf [file Supplementary_1.pdf]

**Supplementary material for:**

**Between a rock and a hard place: experimental assessment of recruitment patterns in a bathyal environment of the Low Arctic**

Sophie Wolvin, Jean-François Hamel, Annie Mercier

## Supplementary results

### *Surface location and microhabitat colonization pattern detail*

Three colonial hydrozoans (Campanulariidae msp. 3, msp. 2, and *Eudendrium* msp. 1) colonized almost all locations and microhabitats available on the substrata (Figure 6A). The most abundant and opportunistic colonizer (Campanulariidae msp. 3) did not display location preferences, except for corners of stone and wood at Site 2. In terms of microhabitat colonization, colonies extended through most microhabitats available, except into the pores of stone at Site 2 or below the outermost surface of mesh at Site 3. Colonies also extended stolons internally in mesh (Sites 1, 2 and 3). Low colonization was observed below the outermost surface of plastic at Site 4. Campanulariidae msp. 2 consistently colonized corners, edges, and centre of the blocks except for edges and corners on mesh at Site 3. Microhabitats were almost all colonized, except below the outermost surface on mesh at Site 3. *Eudendrium* msp. 1 colonized the corner, edge, and centre locations with no exceptions; all microhabitats available were colonized.

An additional four morphospecies exhibited broad colonization of locations and microhabitats across multiple substratum types and sites (Figure 6A). The colonial cnidarian *Octocorallia* msp. 1 had variable settling locations across geographic site and substratum type but occurred in one location per block; the exception was broader colonization of mesh at Site 4 where the morphospecies occurred in two recruitment locations. It colonized the outer microhabitat only at Site 1 across three substratum types (mesh, plastic, and stone) and only the inner microhabitat on plastic at Site 4, while again exhibiting broader colonization on mesh as well as stone, where it colonized all microhabitats available. The benthic Foraminifera msp. 1 also occurred in multiple locations on mesh at Site 1 (3 locations), mesh at Sites 2 and 3 (2

locations each), and stone at Site 4 (2 locations). At Site 1 it also occurred on stone and wood in the centre, and at Site 4 on mesh in the centre. Microhabitat colonization was variable: it occurred in the outer microhabitats of mesh, stone, and wood at Site 1 as well as mesh at Sites 2 and 3, while more broadly colonizing most available microhabitats on mesh and stone at Site 4. The only exception was internal occurrence on mesh at Site 1 and 3. The benthic radiolarian *Radiolaria* msp. 1 conversely was limited to one location per substratum type: it occurred just in the centre of mesh and stone at Site 2 as well as plastic and stone at Site 4. At Sites 3 and 4 it occurred in two microhabitats, inner and internally, while all other occurrences it was in just one microhabitat per substratum type. It was in the middle microhabitat of mesh at Site 2, the outer of plastic at Site 4, and the inner microhabitats of stone at both Site 2 and 4. Individual eggs (*Unknown* msp. 1) occurred in the centre of plastic at Site 1 and stone at Site 2 as well on the edges of stone at Site 4, while showing up in all locations of stone at Site 1. Its microhabitat colonization was limited, as it occurred in the outer microhabitat of plastic at Site 1, and the inner of stone at Sites 1 and 2.

Six mspp recruited to or colonized few locations and microhabitats across two sites (Figure 6B). The unitary cnidarian *Actiniaria* msp. 1 had no specific location trend but occurred in one location per substratum type; it was present in the centre of stone at Site 1 and in the centre of plastic at Site 4. Similarly, it occurred in one microhabitat per substratum type: internally on mesh and outer on stone at Site 1, and middle on plastic at Site 4. The colonial hydrozoan *Campanulariidae* msp. 4 colonized the centre of mesh at Site 1 but more broadly including the edges and corners of mesh at Site 4. Its microhabitat colonization followed a similar pattern, occurring in the outer microhabitat on mesh at Site 1 and all available microhabitats on mesh at Site 4 including extending stolons from the colony internally. Porifera

msp. 1 occurred in one location per site, on the edge of plastic at Site 2 and the centre of mesh at Site 3; microhabitat colonization was the inner microhabitat on plastic at Site 2 and outer on mesh at Site 3. Porifera msp. 3 colonized just one location: centre of mesh at both Site 1 and 2. Broader microhabitat colonization occurred on mesh at Site 1 in both outer and middle microhabitats, while on mesh at Site 2 it colonized just the outer. A biological aggregate (Unknown msp. 3) was present on the edge of wood at Site 2; inner microhabitat colonization occurred on wood at Site 2 and it was present internally on mesh at Site 3.

The remaining seven mspp recruited to or colonized one or more locations and microhabitats but restricted to just one site (Figure 6C). This included two colonial hydrozoans colonizing locations and microhabitats broadly (Campanulariidae msp. 1 and *Eudendrium* msp. 2). Campanulariidae msp. 1 occurred in all locations and microhabitats available on stone at Site 1; *Eudendrium* msp. 2, similarly colonized all locations and microhabitats available on mesh at Site 4. Conversely, another colonial hydrozoan Hydrozoa msp. 1 occurred solely in centre location of stone at Site 1, colonizing the outer microhabitat alone. Foraminifera msp. 2 was present in the centre locations of mesh and stone at Site 4, colonizing the outer microhabitat on the former and the inner on the latter. Foraminifera msp. 4 occurred in the centre of plastic at Site 3, as well as being found internally on mesh at the same site. Its microhabitat colonization of the former occurred in the middle.

## Supplementary tables

Table S1. Recruitment location on the substratum (see Figure 2 for details).

| Location | Description                                             |
|----------|---------------------------------------------------------|
| Center   | Substratum area excluding Corner, Edge, and bolt holes* |
| Edge     | Within 5 mm of sides                                    |
| Corner   | 5 x 5 mm box including corner                           |
| Epibiota | Using another morphospecies as substratum               |

\*Holes through the center of two opposite faces of the panels where they were bolted to the frame.

Table S2. Recruitment features or “microhabitats” on the substratum types (see Figure 2 for details)

| <b>Microhabitat</b> | <b>Description</b>                                         |
|---------------------|------------------------------------------------------------|
| <b>Mesh</b>         |                                                            |
| <i>Unsheltered</i>  | Outermost area                                             |
| <i>Sheltered</i>    | Below outermost surface, between and inside sheets of mesh |
| <b>Plastic</b>      |                                                            |
| <i>Unsheltered</i>  | Outermost area at top of plastic protuberances             |
| <i>Sheltered</i>    | Side or between plastic protuberances, and surface at base |
| <b>Stone</b>        |                                                            |
| <i>Unsheltered</i>  | Outermost area                                             |
| <i>Sheltered</i>    | Inside crevices and indentations below surface             |
| <b>Wood</b>         |                                                            |
| <i>Unsheltered</i>  | Outermost area                                             |
| <i>Sheltered</i>    | Found below surface of substratum (boring)                 |

Table S3. Deployment information for all settlement frames on moorings and landers.

| <b>Name</b> | <b>Site ID</b> | <b>Method</b> | <b>Depth (m)</b> | <b>Altitude (m)</b> | <b>Deployed</b> | <b>Recovered</b> | <b>Latitude</b> | <b>Longitude</b> |
|-------------|----------------|---------------|------------------|---------------------|-----------------|------------------|-----------------|------------------|
| Site 1      | HiBioA         | Mooring       | 499              | 10                  | Oct 2017        | Jul 2018         | 60.46083° N     | – 61.26217° W    |
| Site 2      | HiBioC         | Mooring       | 960              | 60                  | Aug 2018        | Jul 2019         | 60.46406° N     | – 61.15908° W    |
| Site 3      | SpongeSite3    | Lander        | 410              | 1                   | Jul 2018        | Jul 2019         | 60.46738° N     | – 61.28785° W    |
| Site 4      | HiBioA         | Mooring       | 505              | 16                  | Jul 2019        | Aug 2020         | 60.47417° N     | – 60.26944° W    |
| Site 5*     | HiBioB         | Mooring       | 1855             | 30                  | Aug 2018        | -                | 60.47365° N     | – 60.37526° W    |
| Site 6*     | HiBioC         | Mooring       | 1025             | 12                  | Jul 2019        | -                | 60.46405° N     | – 61.15780° W    |

\*Not recovered

Table S4. Total abundance of all individuals or colonies of all morphospecies present on four substratum types at four sites in the Labrador Sea (Canada).

| Phylum/<br>Morphospecies | Site 1       |              |              |            | Site 1<br>Total | Site 2     |              |           |           | Site 2<br>Total | Site 3     |             |             |          | Site 3<br>Total | Site 4       |              |              |             | Site 4<br>Total | Mesh<br>Total | Plastic<br>Total | Stone<br>Total | Wood<br>Total | All blocks<br>pooled |
|--------------------------|--------------|--------------|--------------|------------|-----------------|------------|--------------|-----------|-----------|-----------------|------------|-------------|-------------|----------|-----------------|--------------|--------------|--------------|-------------|-----------------|---------------|------------------|----------------|---------------|----------------------|
|                          | Mesh         | Plastic      | Stone        | Wood       |                 | Mesh       | Plastic      | Stone     | Wood      |                 | Mesh       | Plastic     | Stone       | Wood     |                 | Mesh         | Plastic      | Stone        | Wood        |                 |               |                  |                |               |                      |
| <b>Annelida</b>          | <b>0</b>     | <b>0</b>     | <b>0</b>     | <b>0</b>   | <b>0</b>        | <b>0</b>   | <b>0</b>     | <b>0</b>  | <b>0</b>  | <b>0</b>        | <b>2</b>   | <b>0</b>    | <b>0</b>    | <b>0</b> | <b>2</b>        | <b>0</b>     | <b>0</b>     | <b>1</b>     | <b>0</b>    | <b>1</b>        | <b>2</b>      | <b>0</b>         | <b>1</b>       | <b>0</b>      | <b>3</b>             |
| Polychaeta mmsp. 1       | 0            | 0            | 0            | 0          | 0               | 0          | 0            | 0         | 0         | 0               | 1          | 0           | 0           | 0        | 1               | 0            | 0            | 1            | 0           | 1               | 1             | 0                | 1              | 0             | 2                    |
| Polychaeta mmsp. 2       | 0            | 0            | 0            | 0          | 0               | 0          | 0            | 0         | 0         | 0               | 1          | 0           | 0           | 0        | 1               | 0            | 0            | 0            | 0           | 0               | 1             | 0                | 0              | 0             | 1                    |
| <b>Arthropoda</b>        | <b>22</b>    | <b>0</b>     | <b>0</b>     | <b>0</b>   | <b>22</b>       | <b>20</b>  | <b>1</b>     | <b>0</b>  | <b>0</b>  | <b>21</b>       | <b>7</b>   | <b>11</b>   | <b>13</b>   | <b>0</b> | <b>31</b>       | <b>49</b>    | <b>3</b>     | <b>0</b>     | <b>1</b>    | <b>53</b>       | <b>98</b>     | <b>15</b>        | <b>13</b>      | <b>1</b>      | <b>127</b>           |
| Caprellidae mmsp. 1      | 1            | 0            | 0            | 0          | 1               | 0          | 0            | 0         | 0         | 0               | 0          | 0           | 0           | 0        | 0               | 19           | 1            | 0            | 0           | 20              | 20            | 1                | 0              | 0             | 21                   |
| Copepoda mmsp. 1         | 16           | 0            | 0            | 0          | 16              | 20         | 1            | 0         | 0         | 21              | 2          | 1           | 0           | 0        | 3               | 20           | 2            | 0            | 1           | 23              | 58            | 4                | 0              | 1             | 63                   |
| Gammaridea mmsp. 1       | 0            | 0            | 0            | 0          | 0               | 0          | 0            | 0         | 0         | 0               | 5          | 10          | 13          | 0        | 28              | 0            | 0            | 0            | 0           | 0               | 5             | 10               | 13             | 0             | 28                   |
| Gammaridea mmsp. 2       | 4            | 0            | 0            | 0          | 4               | 0          | 0            | 0         | 0         | 0               | 0          | 0           | 0           | 0        | 0               | 0            | 0            | 0            | 0           | 0               | 4             | 0                | 0              | 0             | 4                    |
| Halacaridae mmsp. 1      | 1            | 0            | 0            | 0          | 1               | 0          | 0            | 0         | 0         | 0               | 0          | 0           | 0           | 0        | 0               | 0            | 0            | 0            | 0           | 0               | 1             | 0                | 0              | 0             | 1                    |
| Isopoda msp. 1           | 0            | 0            | 0            | 0          | 0               | 0          | 0            | 0         | 0         | 0               | 0          | 0           | 0           | 0        | 0               | 9            | 0            | 0            | 0           | 9               | 9             | 0                | 0              | 0             | 9                    |
| Ostracoda msp. 1         | 0            | 0            | 0            | 0          | 0               | 0          | 0            | 0         | 0         | 0               | 0          | 0           | 0           | 0        | 0               | 1            | 0            | 0            | 0           | 1               | 1             | 0                | 0              | 0             | 1                    |
| <b>Cnidaria</b>          | <b>24497</b> | <b>11296</b> | <b>20462</b> | <b>585</b> | <b>56841</b>    | <b>154</b> | <b>12132</b> | <b>16</b> | <b>40</b> | <b>12342</b>    | <b>93</b>  | <b>4902</b> | <b>3732</b> | <b>0</b> | <b>8728</b>     | <b>16130</b> | <b>13414</b> | <b>17212</b> | <b>2524</b> | <b>49281</b>    | <b>40875</b>  | <b>41745</b>     | <b>41422</b>   | <b>3149</b>   | <b>127191</b>        |
| Actinaria msp. 1         | 1            | 0            | 0            | 0          | 1               | 0          | 0            | 0         | 0         | 0               | 0          | 0           | 0           | 0        | 0               | 2            | 1            | 0            | 0           | 3               | 3             | 1                | 0              | 0             | 4                    |
| Campanulariidae msp. 1   | 0            | 0            | 0            | 0          | 0               | 0          | 0            | 13        | 0         | 13              | 0          | 0           | 0           | 0        | 0               | 0            | 0            | 0            | 0           | 0               | 0             | 0                | 13             | 0             | 13                   |
| Campanulariidae msp. 2A  | 64           | 67           | 29           | 0          | 160             | 0          | 0            | 0         | 0         | 0               | 7          | 3           | 6           | 0        | 16              | 97           | 116          | 78           | 73          | 364             | 168           | 186              | 113            | 73            | 540                  |
| Campanulariidae msp. 2B  | 0            | 625          | 327          | 0          | 951             | 0          | 0            | 0         | 0         | 0               | 0          | 139         | 0           | 0        | 139             | 0            | 1076         | 897          | 850         | 2822            | 0             | 1840             | 1224           | 850           | 3913                 |
| Campanulariidae msp. 3   | 23696        | 10489        | 19793        | 585        | 54563           | 154        | 12132        | 3         | 40        | 12329           | 56         | 4043        | 2823        | 0        | 6922            | 9815         | 10683        | 15525        | 1510        | 37533           | 33721         | 37347            | 38145          | 2135          | 111347               |
| Campanulariidae msp. 4   | 1            | 0            | 0            | 0          | 1               | 0          | 0            | 0         | 0         | 0               | 0          | 0           | 0           | 0        | 0               | 15           | 0            | 0            | 0           | 15              | 16            | 0                | 0              | 0             | 16                   |
| Eudendrium msp. 1        | 734          | 114          | 312          | 0          | 1160            | 0          | 0            | 0         | 0         | 0               | 30         | 717         | 903         | 0        | 1650            | 1802         | 1538         | 707          | 91          | 4138            | 2567          | 2368             | 1922           | 91            | 6948                 |
| Eudendrium msp. 2        | 0            | 0            | 0            | 0          | 0               | 0          | 0            | 0         | 0         | 0               | 0          | 0           | 0           | 0        | 0               | 4396         | 0            | 0            | 0           | 4396            | 4396          | 0                | 0              | 0             | 4396                 |
| Hydrozoa msp. 1          | 0            | 0            | 0            | 0          | 0               | 0          | 0            | 0         | 0         | 0               | 0          | 0           | 0           | 0        | 0               | 0            | 0            | 2            | 0           | 2               | 0             | 2                | 0              | 0             | 2                    |
| Octocorallia msp. 1      | 1            | 2            | 1            | 0          | 4               | 0          | 0            | 0         | 0         | 0               | 0          | 0           | 0           | 0        | 0               | 3            | 1            | 3            | 0           | 7               | 4             | 3                | 4              | 0             | 11                   |
| <b>Foraminifera</b>      | <b>134</b>   | <b>0</b>     | <b>2</b>     | <b>1</b>   | <b>137</b>      | <b>6</b>   | <b>0</b>     | <b>0</b>  | <b>0</b>  | <b>6</b>        | <b>88</b>  | <b>2</b>    | <b>1</b>    | <b>0</b> | <b>91</b>       | <b>10</b>    | <b>0</b>     | <b>5</b>     | <b>0</b>    | <b>15</b>       | <b>238</b>    | <b>2</b>         | <b>8</b>       | <b>1</b>      | <b>249</b>           |
| Foraminifera msp. 1      | 134          | 0            | 2            | 1          | 137             | 5          | 0            | 0         | 0         | 5               | 87         | 1           | 1           | 0        | 89              | 7            | 0            | 4            | 0           | 11              | 233           | 1                | 7              | 1             | 242                  |
| Foraminifera msp. 2      | 0            | 0            | 0            | 0          | 0               | 0          | 0            | 0         | 0         | 0               | 0          | 0           | 0           | 0        | 0               | 1            | 0            | 1            | 0           | 2               | 1             | 0                | 1              | 0             | 2                    |
| Foraminifera msp. 3      | 0            | 0            | 0            | 0          | 0               | 1          | 0            | 0         | 0         | 1               | 0          | 0           | 0           | 0        | 0               | 2            | 0            | 0            | 0           | 2               | 3             | 0                | 0              | 0             | 3                    |
| Foraminifera msp. 4      | 0            | 0            | 0            | 0          | 0               | 0          | 0            | 0         | 0         | 0               | 1          | 1           | 0           | 0        | 2               | 0            | 0            | 0            | 0           | 0               | 1             | 1                | 0              | 0             | 2                    |
| <b>Mollusca</b>          | <b>0</b>     | <b>0</b>     | <b>0</b>     | <b>0</b>   | <b>0</b>        | <b>0</b>   | <b>0</b>     | <b>0</b>  | <b>0</b>  | <b>0</b>        | <b>0</b>   | <b>0</b>    | <b>0</b>    | <b>0</b> | <b>0</b>        | <b>35</b>    | <b>0</b>     | <b>0</b>     | <b>0</b>    | <b>35</b>       | <b>35</b>     | <b>0</b>         | <b>0</b>       | <b>0</b>      | <b>35</b>            |
| Gastropoda msp. 1        | 0            | 0            | 0            | 0          | 0               | 0          | 0            | 0         | 0         | 0               | 0          | 0           | 0           | 0        | 0               | 1            | 0            | 0            | 0           | 1               | 1             | 0                | 0              | 0             | 1                    |
| Gastropoda msp. 2        | 0            | 0            | 0            | 0          | 0               | 0          | 0            | 0         | 0         | 0               | 0          | 0           | 0           | 0        | 0               | 34           | 0            | 0            | 0           | 34              | 34            | 0                | 0              | 0             | 34                   |
| <b>Porifera</b>          | <b>2</b>     | <b>0</b>     | <b>0</b>     | <b>0</b>   | <b>2</b>        | <b>1</b>   | <b>0</b>     | <b>0</b>  | <b>0</b>  | <b>1</b>        | <b>1</b>   | <b>0</b>    | <b>0</b>    | <b>0</b> | <b>1</b>        | <b>0</b>     | <b>0</b>     | <b>0</b>     | <b>0</b>    | <b>0</b>        | <b>4</b>      | <b>0</b>         | <b>0</b>       | <b>0</b>      | <b>4</b>             |
| Porifera msp. 1          | 0            | 0            | 0            | 0          | 0               | 0          | 0            | 0         | 0         | 0               | 1          | 0           | 0           | 0        | 1               | 0            | 0            | 0            | 0           | 0               | 1             | 0                | 0              | 0             | 1                    |
| Porifera msp. 2          | 1            | 0            | 0            | 0          | 1               | 1          | 0            | 0         | 0         | 1               | 0          | 0           | 0           | 0        | 0               | 0            | 0            | 0            | 0           | 0               | 2             | 0                | 0              | 0             | 2                    |
| Porifera msp. 3          | 1            | 0            | 0            | 0          | 1               | 0          | 0            | 0         | 0         | 0               | 0          | 0           | 0           | 0        | 0               | 0            | 0            | 0            | 0           | 0               | 1             | 0                | 0              | 0             | 1                    |
| <b>Radiolaria</b>        | <b>0</b>     | <b>0</b>     | <b>0</b>     | <b>0</b>   | <b>0</b>        | <b>1</b>   | <b>0</b>     | <b>1</b>  | <b>0</b>  | <b>2</b>        | <b>2</b>   | <b>0</b>    | <b>0</b>    | <b>0</b> | <b>2</b>        | <b>2</b>     | <b>1</b>     | <b>1</b>     | <b>0</b>    | <b>4</b>        | <b>5</b>      | <b>1</b>         | <b>2</b>       | <b>0</b>      | <b>8</b>             |
| Radiolaria msp. 1        | 0            | 0            | 0            | 0          | 0               | 1          | 0            | 1         | 0         | 2               | 2          | 0           | 0           | 0        | 2               | 2            | 1            | 1            | 0           | 4               | 5             | 1                | 2              | 0             | 8                    |
| <b>Unknown</b>           | <b>0</b>     | <b>0</b>     | <b>99</b>    | <b>0</b>   | <b>99</b>       | <b>0</b>   | <b>0</b>     | <b>2</b>  | <b>1</b>  | <b>3</b>        | <b>1</b>   | <b>0</b>    | <b>0</b>    | <b>0</b> | <b>1</b>        | <b>2</b>     | <b>0</b>     | <b>2</b>     | <b>0</b>    | <b>4</b>        | <b>3</b>      | <b>0</b>         | <b>103</b>     | <b>1</b>      | <b>107</b>           |
| Unknown msp. 1           | 0            | 0            | 99           | 0          | 99              | 0          | 0            | 2         | 0         | 2               | 0          | 0           | 0           | 0        | 0               | 0            | 0            | 2            | 0           | 2               | 0             | 0                | 103            | 0             | 103                  |
| Unknown msp. 2           | 0            | 0            | 0            | 0          | 0               | 0          | 0            | 0         | 0         | 0               | 0          | 0           | 0           | 0        | 0               | 2            | 0            | 0            | 0           | 2               | 2             | 0                | 0              | 0             | 2                    |
| Unknown msp. 3           | 0            | 0            | 0            | 0          | 0               | 0          | 0            | 0         | 1         | 1               | 1          | 0           | 0           | 0        | 1               | 0            | 0            | 0            | 0           | 0               | 1             | 0                | 0              | 1             | 2                    |
| <i>Species pooled</i>    | <i>24655</i> | <i>11296</i> | <i>20563</i> | <i>586</i> | <i>57101</i>    | <i>182</i> | <i>12133</i> | <i>19</i> | <i>41</i> | <i>12375</i>    | <i>194</i> | <i>4915</i> | <i>3746</i> | <i>0</i> | <i>8856</i>     | <i>16228</i> | <i>13418</i> | <i>17221</i> | <i>2525</i> | <i>49393</i>    | <i>41260</i>  | <i>41763</i>     | <i>41549</i>   | <i>3152</i>   | <i>127724</i>        |



Table S5. Density of all individuals or colonies per cm<sup>2</sup> of all morphospecies present on four substratum types at four sites in the Labrador Sea (Canada).

| Phylum/<br>Species      | Site 1   |          |          |          | Site 1<br>Total | Site 2   |          |          |          | Site 2<br>Total | Site 3   |          |          |         | Site 3<br>Total | Site 4   |          |          |          | Site 4<br>Total | Mesh<br>Total | Plastic<br>Total | Stone<br>Total | Wood<br>Total | All blocks<br>pooled |
|-------------------------|----------|----------|----------|----------|-----------------|----------|----------|----------|----------|-----------------|----------|----------|----------|---------|-----------------|----------|----------|----------|----------|-----------------|---------------|------------------|----------------|---------------|----------------------|
|                         | Mesh     | Plastic  | Stone    | Wood     |                 | Mesh     | Plastic  | Stone    | Wood     |                 | Mesh     | Plastic  | Stone    | Wood    |                 | Mesh     | Plastic  | Stone    | Wood     |                 |               |                  |                |               |                      |
| <b>Annelida</b>         | 0        | 0        | 0        | 0        | 0               | 0        | 0        | 0        | 0        | 0               | 0.002472 | 0        | 0        | 0       | 0.00063         | 0        | 0        | 0.001459 | 0        | 0.00073         | 0.00063       | 0                | 0.00073        | 0             | 0.0006625            |
| Polychaeta msp. 1       | 0        | 0        | 0        | 0        | 0               | 0        | 0        | 0        | 0        | 0               | 0.002593 | 0        | 0        | 0       | 0.00065         | 0        | 0        | 0.002917 | 0        | 0.00073         | 0.00065       | 0                | 0.00073        | 0             | 0.0003444            |
| Polychaeta msp. 2       | 0        | 0        | 0        | 0        | 0               | 0        | 0        | 0        | 0        | 0               | 0.002351 | 0        | 0        | 0       | 0.00059         | 0        | 0        | 0        | 0        | 0               | 0.00059       | 0                | 0              | 0             | 0.0001469            |
| <b>Arthropoda</b>       | 0.004693 | 0        | 0        | 0        | 0.00563         | 0.003751 | 0.000504 | 0        | 0        | 0.00433         | 0.001829 | 0.002268 | 0.002575 | 0       | 0.00262         | 0.009338 | 0.001461 | 0        | 0.002461 | 0.00465         | 0.00562       | 0.00187          | 0.00317        | 0.00029       | 0.0039283            |
| Caprellidae msp. 1      | 0.002589 | 0        | 0        | 0        | 0.00065         | 0        | 0        | 0        | 0        | 0               | 0        | 0        | 0        | 0       | 0               | 0.023258 | 0.003341 | 0        | 0        | 0.00665         | 0.00646       | 0.00084          | 0              | 0             | 0.0018243            |
| Copepoda msp. 1         | 0.020978 | 0        | 0        | 0        | 0.00524         | 0.026258 | 0.003531 | 0        | 0        | 0.00745         | 0.005185 | 0.003363 | 0        | 0       | 0.00214         | 0.017701 | 0.006886 | 0        | 0.017229 | 0.01045         | 0.01753       | 0.00344          | 0              | 0.00431       | 0.0063207            |
| Gammaridea msp. 1       | 0        | 0        | 0        | 0        | 0               | 0        | 0        | 0        | 0        | 0               | 0.00762  | 0.012514 | 0.018022 | 0       | 0.00954         | 0        | 0        | 0        | 0        | 0               | 0.0019        | 0.00313          | 0.00451        | 0             | 0.0023848            |
| Gammaridea msp. 2       | 0.006694 | 0        | 0        | 0        | 0.00167         | 0        | 0        | 0        | 0        | 0               | 0        | 0        | 0        | 0       | 0               | 0        | 0        | 0        | 0        | 0               | 0.00167       | 0                | 0              | 0             | 0.0004184            |
| Halacaridae msp. 1      | 0.002589 | 0        | 0        | 0        | 0.00065         | 0        | 0        | 0        | 0        | 0               | 0        | 0        | 0        | 0       | 0               | 0        | 0        | 0        | 0        | 0               | 0.00065       | 0                | 0              | 0             | 0.0001618            |
| Isopoda msp. 1          | 0        | 0        | 0        | 0        | 0               | 0        | 0        | 0        | 0        | 0               | 0        | 0        | 0        | 0       | 0               | 0.022034 | 0        | 0        | 0        | 0.00351         | 0.00551       | 0                | 0              | 0             | 0.0013771            |
| Ostracoda msp. 1        | 0        | 0        | 0        | 0        | 0               | 0        | 0        | 0        | 0        | 0               | 0        | 0        | 0        | 0       | 0               | 0.002371 | 0        | 0        | 0        | 0.00059         | 0.00059       | 0                | 0              | 0             | 0.0001482            |
| <b>Cnidaria</b>         | 1.257467 | 1.701541 | 1.094506 | 0.245626 | 5.49231         | 0.02398  | 0.85651  | 0.001109 | 0.058737 | 1.30164         | 0.009506 | 0.3348   | 0.285714 | 0       | 0.78104         | 0.717661 | 1.123788 | 1.091242 | 2.055479 | 3.45369         | 2.36894       | 4.09272          | 2.57971        | 0.33644       | 2.8078393            |
| Actinaria msp. 1        | 0.002589 | 0        | 0        | 0        | 0.00065         | 0        | 0        | 0        | 0        | 0               | 0        | 0        | 0        | 0       | 0               | 0.004513 | 0.00338  | 0        | 0        | 0.00197         | 0.00178       | 0.00085          | 0              | 0             | 0.0006552            |
| Campanulariidae msp. 1  | 0        | 0        | 0        | 0        | 0               | 0        | 0        | 0.008357 | 0        | 0.00209         | 0        | 0        | 0        | 0       | 0               | 0        | 0        | 0        | 0        | 0               | 0             | 0.00209          | 0              | 0             | 0.0005223            |
| Campanulariidae msp. 2A | 0.059277 | 0.150447 | 0.022595 | 0        | 0.05808         | 0        | 0        | 0        | 0        | 0               | 0.008916 | 0.010246 | 0.016547 | 0       | 0.00893         | 0.05048  | 0.065779 | 0.056696 | 0.314438 | 0.12185         | 0.02967       | 0.05662          | 0.02396        | 0.07861       | 0.0472139            |
| Campanulariidae msp. 2B | 0        | 3.786513 | 0.759296 | 0        | 1.13645         | 0        | 0        | 0        | 0        | 0               | 0        | 0.469585 | 0        | 0       | 0.1174          | 0        | 3.635953 | 2.635653 | 14.64507 | 5.22917         | 0             | 1.97301          | 0.84874        | 3.66127       | 1.6207546            |
| Campanulariidae msp. 3  | 12.00276 | 12.72666 | 9.919103 | 2.456263 | 9.27619         | 0.239797 | 8.565101 | 0.002734 | 0.587372 | 2.34875         | 0.065495 | 2.364879 | 2.309856 | 0       | 1.18506         | 4.268253 | 6.65449  | 7.781203 | 5.203308 | 5.97681         | 4.14408       | 7.57778          | 5.00322        | 2.06174       | 4.6967043            |
| Campanulariidae msp. 4  | 0.002426 | 0        | 0        | 0        | 0.00061         | 0        | 0        | 0        | 0        | 0               | 0        | 0        | 0        | 0       | 0               | 0.011283 | 0        | 0        | 0        | 0.00282         | 0.00343       | 0                | 0              | 0             | 0.0008368            |
| Eudendrium msp. 1       | 0.505194 | 0.339527 | 0.241741 | 0        | 0.27162         | 0        | 0        | 0        | 0        | 0               | 0.020647 | 0.503288 | 0.530738 | 0       | 0.26367         | 1.102654 | 0.874899 | 0.427002 | 0.391971 | 0.69913         | 0.40712       | 0.42943          | 0.29987        | 0.09799       | 0.3086038            |
| Eudendrium msp. 2       | 0        | 0        | 0        | 0        | 0               | 0        | 0        | 0        | 0        | 0               | 0        | 0        | 0        | 0       | 0               | 1.736979 | 0        | 0        | 0        | 0.43424         | 0.43424       | 0                | 0              | 0             | 0.1085612            |
| Hydrozoa msp. 1         | 0        | 0        | 0        | 0        | 0               | 0        | 0        | 0        | 0        | 0               | 0        | 0        | 0        | 0       | 0               | 0        | 0        | 0.005835 | 0        | 0.00146         | 0             | 0                | 0.00146        | 0             | 0.0003647            |
| Octocorallia msp. 1     | 0.002426 | 0.012264 | 0.002323 | 0        | 0.00425         | 0        | 0        | 0        | 0        | 0               | 0        | 0        | 0        | 0       | 0               | 0.002448 | 0.00338  | 0.006028 | 0        | 0.00296         | 0.00122       | 0.00391          | 0.00209        | 0             | 0.0018044            |
| <b>Foraminifera</b>     | 0.015812 | 0        | 0.001157 | 0.005248 | 0.02808         | 0.003475 | 0        | 0        | 0        | 0.00145         | 0.009836 | 0.001784 | 0.000679 | 0       | 0.01058         | 0.003251 | 0        | 0.002258 | 0        | 0.00161         | 0.01648       | 0.00089          | 0.00126        | 0.00045       | 0.0098878            |
| Foraminifera msp. 1     | 0.063249 | 0        | 0.004626 | 0.020994 | 0.02222         | 0.011584 | 0        | 0        | 0        | 0.0029          | 0.036669 | 0.003521 | 0.002715 | 0       | 0.01073         | 0.006043 | 0        | 0.005921 | 0        | 0.00299         | 0.02939       | 0.00088          | 0.00332        | 0.00525       | 0.0097076            |
| Foraminifera msp. 2     | 0        | 0        | 0        | 0        | 0               | 0        | 0        | 0        | 0        | 0               | 0        | 0        | 0        | 0       | 0               | 0.002257 | 0        | 0.00311  | 0        | 0.00134         | 0.00056       | 0                | 0.00078        | 0             | 0.0003354            |
| Foraminifera msp. 3     | 0        | 0        | 0        | 0        | 0               | 0.002317 | 0        | 0        | 0        | 0.00058         | 0        | 0        | 0        | 0       | 0               | 0.004705 | 0        | 0        | 0        | 0.00118         | 0.00176       | 0                | 0              | 0             | 0.0004389            |
| Foraminifera msp. 4     | 0        | 0        | 0        | 0        | 0               | 0        | 0        | 0        | 0        | 0               | 0.002676 | 0.003617 | 0        | 0.00157 | 0               | 0        | 0        | 0        | 0        | 0               | 0.00067       | 0.0009           | 0              | 0             | 0.0003933            |
| <b>Mollusca</b>         | 0        | 0        | 0        | 0        | 0               | 0        | 0        | 0        | 0        | 0               | 0        | 0        | 0        | 0       | 0               | 0.041428 | 0        | 0        | 0        | 0.01002         | 0.01002       | 0                | 0              | 0             | 0.0100226            |
| Gastropoda msp. 1       | 0        | 0        | 0        | 0        | 0               | 0        | 0        | 0        | 0        | 0               | 0        | 0        | 0        | 0       | 0               | 0.002257 | 0        | 0        | 0        | 0.00056         | 0.00056       | 0                | 0              | 0             | 0.000141             |
| Gastropoda msp. 2       | 0        | 0        | 0        | 0        | 0               | 0        | 0        | 0        | 0        | 0               | 0        | 0        | 0        | 0       | 0               | 0.080599 | 0        | 0        | 0        | 0.02015         | 0.02015       | 0                | 0              | 0             | 0.0050374            |
| <b>Porifera</b>         | 0.001824 | 0        | 0        | 0        | 0.00164         | 0.000772 | 0        | 0        | 0        | 0.00088         | 0.000892 | 0        | 0        | 0       | 0.00082         | 0        | 0        | 0        | 0        | 0               | 0.00111       | 0                | 0              | 0             | 0.0011128            |
| Porifera msp. 1         | 0        | 0        | 0        | 0        | 0               | 0        | 0        | 0        | 0        | 0               | 0.002676 | 0        | 0        | 0       | 0.00067         | 0        | 0        | 0        | 0        | 0               | 0.00067       | 0                | 0              | 0             | 0.0001673            |
| Porifera msp. 2         | 0.002737 | 0        | 0        | 0        | 0.00068         | 0.002317 | 0        | 0        | 0        | 0.00058         | 0        | 0        | 0        | 0       | 0               | 0        | 0        | 0        | 0        | 0               | 0.00126       | 0                | 0              | 0             | 0.0003158            |
| Porifera msp. 3         | 0.002737 | 0        | 0        | 0        | 0.00068         | 0        | 0        | 0        | 0        | 0               | 0        | 0        | 0        | 0       | 0               | 0        | 0        | 0        | 0        | 0               | 0.00068       | 0                | 0              | 0             | 0.000171             |
| <b>Radiolaria</b>       | 0        | 0        | 0        | 0        | 0               | 0.002317 | 0        | 0.002804 | 0        | 0.00087         | 0.005269 | 0        | 0        | 0       | 0.00074         | 0.004513 | 0.00338  | 0.00311  | 0        | 0.00092         | 0.00083       | 0.00085          | 0.00092        | 0             | 0.0008546            |
| Radiozoa msp. 1         | 0        | 0        | 0        | 0        | 0               | 0.002317 | 0        | 0.002804 | 0        | 0.00128         | 0.005269 | 0        | 0        | 0       | 0.00132         | 0.004513 | 0.00338  | 0.00311  | 0        | 0.00275         | 0.00302       | 0.00085          | 0.00148        | 0             | 0.0013371            |
| <b>Unknown</b>          | 0        | 0        | 0.038944 | 0        | 0.04281         | 0        | 0        | 0.001869 | 0.004895 | 0.00136         | 0.000892 | 0        | 0        | 0       | 0.00082         | 0.001504 | 0        | 0.000972 | 0        | 0.0013          | 0.00098       | 0                | 0.02229        | 0.00062       | 0.0131071            |
| Unknown msp. 1          | 0        | 0        | 0.116833 | 0        | 0.02921         | 0        | 0        | 0.005607 | 0        | 0.0014          | 0        | 0        | 0        | 0       | 0               | 0        | 0        | 0.002917 | 0        | 0.00073         | 0             | 0                | 0.03134        | 0             | 0.0078349            |
| Unknown msp. 2          | 0        | 0        | 0        | 0        | 0               | 0        | 0        | 0        | 0        | 0               | 0        | 0        | 0        | 0       | 0               | 0.004513 | 0        | 0        | 0        | 0.00113         | 0.00113       | 0                | 0              | 0             | 0.0002821            |
| Unknown msp. 3          | 0        | 0        | 0        | 0        | 0               | 0        | 0        | 0        | 0.014684 | 0.00367         | 0.002676 | 0        | 0        | 0       | 0.00067         | 0        | 0        | 0        | 0        | 0               | 0.00067       | 0                | 0              | 0.00367       | 0.001085             |
| <i>Species pooled</i>   | 65.5377  | 85.9198  | 55.1222  | 1.9028   | 52.1206         | 1.42423  | 42.8486  | 0.09775  | 0.50575  | 11.2191         | 0.81089  | 16.7915  | 14.2945  | 0       | 10.6323         | 36.3966  | 56.5126  | 54.9234  | 12.0201  | 39.9632         | 26.0423       | 50.5182          | 31.7337        | 4.80956       | 28.4838              |



Table S7. Base coverage (%) of all individuals or colonies of all morphospecies present on four substratum types at four sites in the Labrador Sea (Canada).

| Species                 | Site 1    |           |           |           | Site 2   |           |           |          | Site 3   |           |           |  | Site 4    |           |           |            |
|-------------------------|-----------|-----------|-----------|-----------|----------|-----------|-----------|----------|----------|-----------|-----------|--|-----------|-----------|-----------|------------|
|                         | Mesh      | Plastic   | Stone     | Wood      | Mesh     | Plastic   | Stone     | Wood     | Mesh     | Plastic   | Stone     |  | Mesh      | Plastic   | Stone     | Wood       |
| <b>Annelida</b>         | <b>0</b>  | <b>0</b>  | <b>0</b>  | <b>0</b>  | <b>0</b> | <b>0</b>  | <b>0</b>  | <b>0</b> | <b>6</b> | <b>0</b>  | <b>0</b>  |  | <b>0</b>  | <b>0</b>  | <b>1</b>  | <b>0</b>   |
| Polychaeta msp. 1       | 0         | 0         | 0         | 0         | 0        | 0         | 0         | 0        | 5        | 0         | 0         |  | 0         | 0         | 1         | 0          |
| Polychaeta msp. 2       | 0         | 0         | 0         | 0         | 0        | 0         | 0         | 0        | 1        | 0         | 0         |  | 0         | 0         | 0         | 0          |
| <b>Arthropoda</b>       | <b>6</b>  | <b>0</b>  | <b>0</b>  | <b>0</b>  | <b>2</b> | <b>1</b>  | <b>0</b>  | <b>0</b> | <b>1</b> | <b>2</b>  | <b>1</b>  |  | <b>12</b> | <b>1</b>  | <b>0</b>  | <b>1</b>   |
| Caprellidae msp. 1      | 0         | 0         | 0         | 0         | 0        | 0         | 0         | 0        | 0        | 0         | 0         |  | 3         | 0         | 0         | 0          |
| Copepoda msp. 1         | 1         | 0         | 0         | 0         | 2        | 1         | 0         | 0        | 0        | 1         | 0         |  | 3         | 1         | 0         | 1          |
| Gammaridea msp. 1       | 0         | 0         | 0         | 0         | 0        | 0         | 0         | 0        | 1        | 1         | 1         |  | 0         | 0         | 0         | 0          |
| Gammaridea msp. 2       | 4         | 0         | 0         | 0         | 0        | 0         | 0         | 0        | 0        | 0         | 0         |  | 0         | 0         | 0         | 0          |
| Halacaridae msp. 1      | 1         | 0         | 0         | 0         | 0        | 0         | 0         | 0        | 0        | 0         | 0         |  | 0         | 0         | 0         | 0          |
| Isopoda msp. 1          | 0         | 0         | 0         | 0         | 0        | 0         | 0         | 0        | 0        | 0         | 0         |  | 5         | 0         | 0         | 0          |
| Ostracoda msp. 1        | 0         | 0         | 0         | 0         | 0        | 0         | 0         | 0        | 0        | 0         | 0         |  | 1         | 0         | 0         | 0          |
| <b>Cnidaria</b>         | <b>23</b> | <b>48</b> | <b>36</b> | <b>62</b> | <b>9</b> | <b>13</b> | <b>15</b> | <b>5</b> | <b>5</b> | <b>13</b> | <b>32</b> |  | <b>82</b> | <b>47</b> | <b>38</b> | <b>131</b> |
| Actinaria msp. 1        | 0         | 0         | 0         | 0         | 0        | 0         | 0         | 0        | 0        | 0         | 0         |  | 1         | 1         | 0         | 0          |
| Campanulariidae msp. 1  | 0         | 0         | 0         | 0         | 0        | 0         | 5         | 0        | 0        | 0         | 0         |  | 0         | 0         | 0         | 0          |
| Campanulariidae msp. 2A | 4         | 8         | 3         | 0         | 0        | 0         | 0         | 0        | 1        | 1         | 5         |  | 4         | 5         | 6         | 17         |
| Campanulariidae msp. 2B | 0         | 8         | 5         | 0         | 0        | 0         | 0         | 0        | 0        | 3         | 0         |  | 0         | 5         | 5         | 50         |
| Campanulariidae msp. 3  | 11        | 28        | 18        | 62        | 9        | 13        | 10        | 5        | 2        | 6         | 18        |  | 8         | 24        | 18        | 52         |
| Campanulariidae msp. 4  | 1         | 0         | 0         | 0         | 0        | 0         | 0         | 0        | 0        | 0         | 0         |  | 1         | 0         | 0         | 0          |
| Eudendrium msp. 1       | 6         | 3         | 8         | 0         | 0        | 0         | 0         | 0        | 2        | 3         | 10        |  | 5         | 11        | 8         | 13         |
| Eudendrium msp. 2       | 0         | 0         | 0         | 0         | 0        | 0         | 0         | 0        | 0        | 0         | 0         |  | 62        | 0         | 0         | 0          |
| Hydrozoa msp. 1         | 0         | 0         | 0         | 0         | 0        | 0         | 0         | 0        | 0        | 0         | 0         |  | 0         | 0         | 1         | 0          |
| Octocorallia msp. 1     | 1         | 1         | 1         | 0         | 0        | 0         | 0         | 0        | 0        | 0         | 0         |  | 1         | 1         | 1         | 0          |
| <b>Foraminifera</b>     | <b>4</b>  | <b>0</b>  | <b>1</b>  | <b>1</b>  | <b>2</b> | <b>0</b>  | <b>0</b>  | <b>0</b> | <b>1</b> | <b>2</b>  | <b>1</b>  |  | <b>3</b>  | <b>0</b>  | <b>2</b>  | <b>0</b>   |
| Foraminifera msp. 1     | 4         | 0         | 1         | 1         | 1        | 0         | 0         | 0        | 1        | 1         | 1         |  | 1         | 0         | 1         | 0          |
| Foraminifera msp. 2     | 0         | 0         | 0         | 0         | 0        | 0         | 0         | 0        | 0        | 0         | 0         |  | 1         | 0         | 1         | 0          |
| Foraminifera msp. 3     | 0         | 0         | 0         | 0         | 1        | 0         | 0         | 0        | 0        | 0         | 0         |  | 1         | 0         | 0         | 0          |
| Foraminifera msp. 4     | 0         | 0         | 0         | 0         | 0        | 0         | 0         | 0        | 0        | 1         | 0         |  | 0         | 0         | 0         | 0          |
| <b>Mollusca</b>         | <b>0</b>  | <b>0</b>  | <b>0</b>  | <b>0</b>  | <b>0</b> | <b>0</b>  | <b>0</b>  | <b>0</b> | <b>0</b> | <b>0</b>  | <b>0</b>  |  | <b>1</b>  | <b>0</b>  | <b>0</b>  | <b>0</b>   |
| Gastropoda msp. 1       | 0         | 0         | 0         | 0         | 0        | 0         | 0         | 0        | 0        | 0         | 0         |  | 1         | 0         | 0         | 0          |
| Gastropoda msp. 2       | 0         | 0         | 0         | 0         | 0        | 0         | 0         | 0        | 0        | 0         | 0         |  | 0         | 0         | 0         | 0          |
| <b>Porifera</b>         | <b>1</b>  | <b>0</b>  | <b>0</b>  | <b>0</b>  | <b>1</b> | <b>0</b>  | <b>0</b>  | <b>0</b> | <b>5</b> | <b>0</b>  | <b>0</b>  |  | <b>0</b>  | <b>0</b>  | <b>0</b>  | <b>0</b>   |
| Porifera msp. 1         | 0         | 0         | 0         | 0         | 0        | 0         | 0         | 0        | 5        | 0         | 0         |  | 0         | 0         | 0         | 0          |
| Porifera msp. 2         | 1         | 0         | 0         | 0         | 1        | 0         | 0         | 0        | 0        | 0         | 0         |  | 0         | 0         | 0         | 0          |
| Porifera msp. 3         | 0         | 0         | 0         | 0         | 0        | 0         | 0         | 0        | 0        | 0         | 0         |  | 0         | 0         | 0         | 0          |
| <b>Radiolaria</b>       | <b>0</b>  | <b>0</b>  | <b>0</b>  | <b>0</b>  | <b>1</b> | <b>0</b>  | <b>1</b>  | <b>0</b> | <b>0</b> | <b>0</b>  | <b>0</b>  |  | <b>0</b>  | <b>1</b>  | <b>1</b>  | <b>0</b>   |
| Radiolaria msp. 1       | 0         | 0         | 0         | 0         | 1        | 0         | 1         | 0        | 0        | 0         | 0         |  | 0         | 1         | 1         | 0          |
| <b>Unknown</b>          | <b>0</b>  | <b>0</b>  | <b>4</b>  | <b>0</b>  | <b>0</b> | <b>0</b>  | <b>1</b>  | <b>1</b> | <b>0</b> | <b>0</b>  | <b>0</b>  |  | <b>0</b>  | <b>0</b>  | <b>1</b>  | <b>0</b>   |
| Unknown msp. 1          | 0         | 0         | 4         | 0         | 0        | 0         | 1         | 0        | 0        | 0         | 0         |  | 0         | 0         | 1         | 0          |
| Unknown msp. 2          | 0         | 0         | 0         | 0         | 0        | 0         | 0         | 0        | 0        | 0         | 0         |  | 0         | 0         | 0         | 0          |
| Unknown msp. 3          | 0         | 0         | 0         | 0         | 0        | 0         | 0         | 1        | 0        | 0         | 0         |  | 0         | 0         | 0         | 0          |

Table S8. Canopy coverage (%) of all individuals or colonies of all morphospecies present on four substratum types at four sites in the Labrador Sea (Canada).

[illegible]

Table S9. Results of PERMANOVA and two-way crossed analysis of similarity (ANOSIM) tests on Bray-Curtis resemblance matrices on the four substratum types and four geographic sites in Labrador Sea (Canada). Global results are indicated in bold.

| PERMANOVA                |             |                  |                   |                  | ANOSIM                   |              |                  |                   |                  |
|--------------------------|-------------|------------------|-------------------|------------------|--------------------------|--------------|------------------|-------------------|------------------|
| Substratum Type          | Pseudo-F    | Significance (p) | Dissimilarity (p) | Significance (p) | Geographic site          | Pseudo-F     | Significance (p) | Dissimilarity (p) | Significance (p) |
| <b>Base coverage</b>     | <b>5.28</b> | <b>&lt;0.001</b> | <b>0.441</b>      | <b>&lt;0.001</b> | <b>Base coverage</b>     | <b>10.05</b> | <b>&lt;0.001</b> | <b>0.67</b>       | <b>&lt;0.001</b> |
| Mesh, Plastic            |             |                  | 0.583             | <0.001           | Site 1, Site 2           |              |                  | 0.951             | 0.001            |
| Mesh, Stone              |             |                  | 0.556             | 0.004            | Site 1, Site 3           |              |                  | 0.58              | 0.006            |
| Mesh, Wood               |             |                  | 0.704             | 0.047            | Site 1, Site 4           |              |                  | 0.025             | 0.405            |
| Plastic, Stone           |             |                  | 0.213             | 0.067            | Site 2, Site 3           |              |                  | 0.901             | 0.001            |
| Plastic, Wood            |             |                  | 0.852             | 0.016            | Site 2, Site 4           |              |                  | 0.84              | 0.001            |
| Stone, Wood              |             |                  | 0.259             | 0.172            | Site 3, Site 4           |              |                  | 0.63              | 0.002            |
| <b>Canopy coverage</b>   | <b>3.39</b> | <b>&lt;0.001</b> | <b>0.352</b>      | <b>&lt;0.001</b> | <b>Canopy coverage</b>   | <b>10.11</b> | <b>&lt;0.001</b> | <b>0.592</b>      | <b>&lt;0.001</b> |
| Mesh, Plastic            |             |                  | 0.37              | 0.005            | Site 1, Site 2           |              |                  | 0.938             | 0.001            |
| Mesh, Stone              |             |                  | 0.463             | 0.002            | Site 1, Site 3           |              |                  | 0.383             | 0.032            |
| Mesh, Wood               |             |                  | 0.111             | 0.422            | Site 1, Site 4           |              |                  | 0.012             | 0.456            |
| Plastic, Stone           |             |                  | 0.389             | 0.006            | Site 2, Site 3           |              |                  | 0.704             | 0.003            |
| Plastic, Wood            |             |                  | 0.704             | 0.016            | Site 2, Site 4           |              |                  | 0.963             | 0.001            |
| Stone, Wood              |             |                  | 0.333             | 0.125            | Site 3, Site 4           |              |                  | 0.494             | 0.003            |
| <b>Abundance</b>         | <b>8.15</b> | <b>&lt;0.001</b> | <b>0.471</b>      | <b>&lt;0.001</b> | <b>Abundance</b>         | <b>10.99</b> | <b>&lt;0.001</b> | <b>0.617</b>      | <b>&lt;0.001</b> |
| Mesh, Plastic            |             |                  | 0.657             | <0.001           | Site 1, Site 2           |              |                  | 0.889             | 0.001            |
| Mesh, Stone              |             |                  | 0.593             | 0.001            | Site 1, Site 3           |              |                  | 0.753             | 0.002            |
| Mesh, Wood               |             |                  | 0.63              | 0.063            | Site 1, Site 4           |              |                  | -0.062            | 0.599            |
| Plastic, Stone           |             |                  | 0.185             | 0.125            | Site 2, Site 3           |              |                  | 0.926             | 0.001            |
| Plastic, Wood            |             |                  | 0.704             | 0.047            | Site 2, Site 4           |              |                  | 0.827             | 0.001            |
| Stone, Wood              |             |                  | 0.556             | 0.109            | Site 3, Site 4           |              |                  | 0.457             | 0.002            |
| <b>Density</b>           | <b>6.74</b> | <b>&lt;0.001</b> | <b>0.405</b>      | <b>&lt;0.001</b> | <b>Density</b>           | <b>9.31</b>  | <b>&lt;0.001</b> | <b>0.553</b>      | <b>&lt;0.001</b> |
| Mesh, Plastic            |             |                  | 0.5               | 0.006            | Site 1, Site 2           |              |                  | 0.877             | 0.001            |
| Mesh, Stone              |             |                  | 0.463             | 0.006            | Site 1, Site 3           |              |                  | 0.778             | 0.001            |
| Mesh, Wood               |             |                  | 0.556             | 0.078            | Site 1, Site 4           |              |                  | -0.025            | 0.49             |
| Plastic, Stone           |             |                  | 0.157             | 0.163            | Site 2, Site 3           |              |                  | 0.901             | 0.001            |
| Plastic, Wood            |             |                  | 0.704             | 0.047            | Site 2, Site 4           |              |                  | 0.605             | 0.002            |
| Stone, Wood              |             |                  | 0.407             | 0.188            | Site 3, Site 4           |              |                  | 0.259             | 0.034            |
| <b>Shannon diversity</b> | <b>1.07</b> | <b>0.374</b>     | <b>0.212</b>      | <b>0.025</b>     | <b>Shannon diversity</b> | <b>3.82</b>  | <b>&lt;0.001</b> | <b>0.292</b>      | <b>&lt;0.001</b> |
| Mesh, Plastic            |             |                  | 0.339             | 0.019            | Site 1, Site 2           |              |                  | 0.267             | 0.033            |
| Mesh, Stone              |             |                  | 0.139             | 0.172            | Site 1, Site 3           |              |                  | 0.346             | 0.01             |
| Mesh, Wood               |             |                  | 0.556             | 0.078            | Site 1, Site 4           |              |                  | 0.074             | 0.324            |
| Plastic, Stone           |             |                  | 0.021             | 0.374            | Site 2, Site 3           |              |                  | 0.558             | 0.001            |
| Plastic, Wood            |             |                  | 0.407             | 0.094            | Site 2, Site 4           |              |                  | 0.304             | 0.04             |
| Stone, Wood              |             |                  | 0.185             | 0.266            | Site 3, Site 4           |              |                  | 0.259             | 0.077            |
| <b>Species richness</b>  | <b>8.62</b> | <b>&lt;0.001</b> | <b>0.326</b>      | <b>0.005</b>     | <b>Species richness</b>  | <b>9.87</b>  | <b>&lt;0.001</b> | <b>0.328</b>      | <b>0.002</b>     |
| Mesh, Plastic            |             |                  | 0.569             | 0.001            | Site 1, Site 2           |              |                  | 0.543             | 0.01             |
| Mesh, Stone              |             |                  | 0.514             | <0.001           | Site 1, Site 3           |              |                  | 0.006             | 0.436            |
| Mesh, Wood               |             |                  | 1                 | 0.016            | Site 1, Site 4           |              |                  | 0.08              | 0.814            |
| Plastic, Stone           |             |                  | -0.046            | 0.58             | Site 2, Site 3           |              |                  | 0.58              | 0.004            |
| Plastic, Wood            |             |                  | 0.037             | 0.484            | Site 2, Site 4           |              |                  | 0.765             | 0.001            |
| Stone, Wood              |             |                  | -0.296            | 1                | Site 3, Site 4           |              |                  | 0.012             | 0.507            |
| <b>Phylum richness</b>   | <b>9.19</b> | <b>&lt;0.001</b> | <b>0.247</b>      | <b>0.019</b>     | <b>Phylum richness</b>   | <b>2.51</b>  | <b>0.07</b>      | <b>0.066</b>      | <b>0.237</b>     |
| Mesh, Plastic            |             |                  | 0.625             | <0.001           | Site 1, Site 2           |              |                  | -0.167            | 1                |
| Mesh, Stone              |             |                  | 0.366             | 0.01             | Site 1, Site 3           |              |                  | 0.296             | 0.056            |
| Mesh, Wood               |             |                  | 0.852             | 0.031            | Site 1, Site 4           |              |                  | 0.056             | 0.472            |
| Plastic, Stone           |             |                  | -0.13             | 0.761            | Site 2, Site 3           |              |                  | 0.222             | 0.13             |
| Plastic, Wood            |             |                  | -0.222            | 1                | Site 2, Site 4           |              |                  | 0.111             | 0.262            |
| Stone, Wood              |             |                  | -0.333            | 0.969            | Site 3, Site 4           |              |                  | -0.117            | 0.73             |

  

| PERMANOVA                |             |                  |
|--------------------------|-------------|------------------|
| Site x Substratum type   | Pseudo-F    | Significance (p) |
| <b>Base coverage</b>     | <b>3.01</b> | <b>&lt;0.001</b> |
| <b>Canopy coverage</b>   | <b>3.01</b> | <b>&lt;0.001</b> |
| <b>Abundance</b>         | <b>3.46</b> | <b>&lt;0.001</b> |
| <b>Density</b>           | <b>3.64</b> | <b>&lt;0.001</b> |
| <b>Shannon diversity</b> | <b>2.35</b> | <b>0.002</b>     |
| <b>Species richness</b>  | <b>0.89</b> | <b>0.549</b>     |
| <b>Phylum richness</b>   | <b>0.55</b> | <b>0.82</b>      |

## Supplementary figures

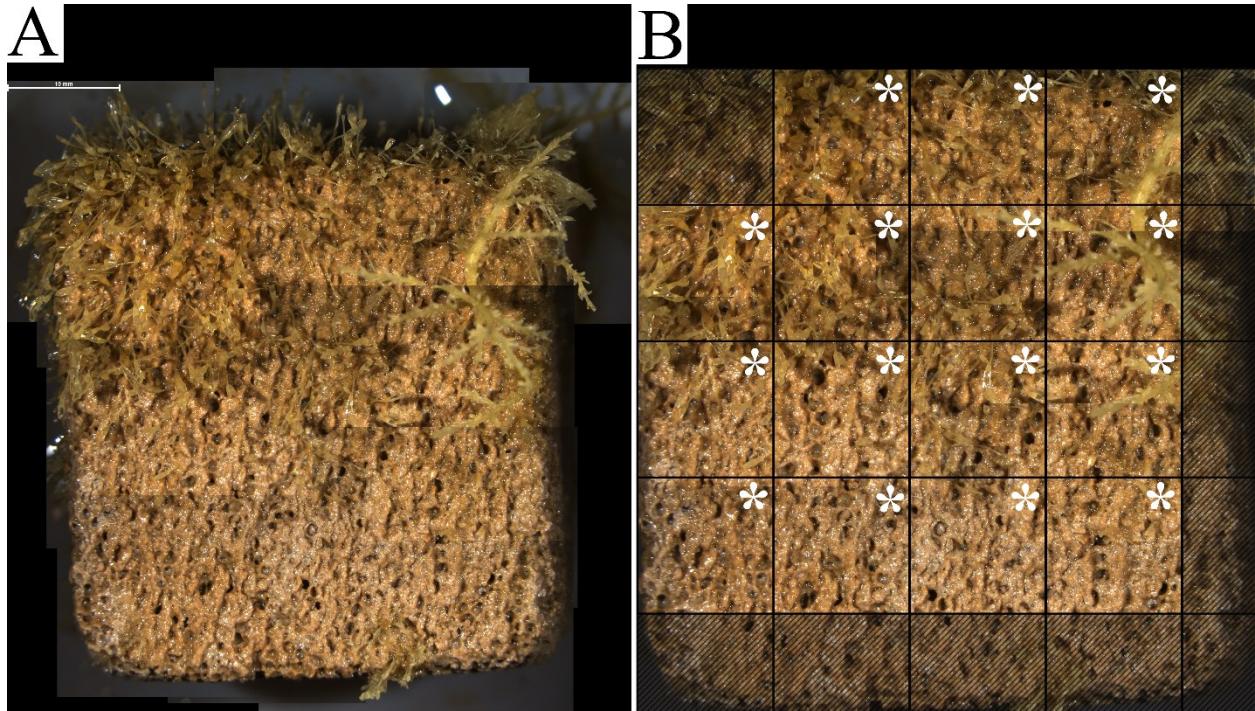

Figure S1. Sample of a mosaic image and the grid overlays used for morphospecies abundance measurements from “Face #2” of “Stone #1” of Site 4, e.g., the second face examined on one of the three carbonate block replicates at Site 4. Cross-hatching indicates squares excluded on all substratum types due to erosion (corners), or an incomplete grid square. Scale bar is 10 mm. (A) The mosaic image generated using individual photographs taken of each section of the surface using the Leica M205 stereo microscope and LAS-X software, then stitched together in Adobe Photoshop CS6. (B) A grid overlay of 1 cm squares on the mosaic image, used for surfaces with more sparse colonization.
